# Supplementary material for: Pediatric Liver and Transplant Surgery: Results of an International Survey and Expert Consensus Recommendations
Source: MDPI journal article supplement (doi:10.3390/jcm12093229), 2023-04-30
Supplement: s1 [file s1]

# Current concepts of pediatric liver surgery and pediatric liver transplantation

Tuesday, June 29, 2021

# 24

**Total Responses**

Date Created: Tuesday, August 11, 2020

Complete Responses: 24

## Q2: Hospital departments at your Institution:

Answered: 24 Skipped: 0

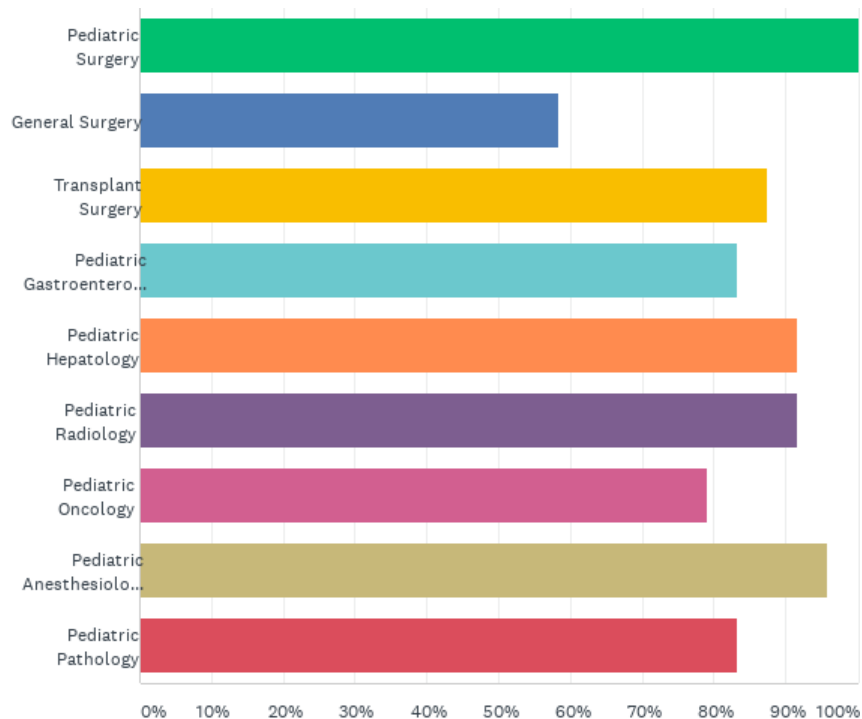

## Q2: Hospital departments at your Institution:

Answered: 24   Skipped: 0

| ANSWER CHOICES             | RESPONSES |    |
|----------------------------|-----------|----|
| Pediatric Surgery          | 100.00%   | 24 |
| General Surgery            | 58.33%    | 14 |
| Transplant Surgery         | 87.50%    | 21 |
| Pediatric Gastroenterology | 83.33%    | 20 |
| Pediatric Hepatology       | 91.67%    | 22 |
| Pediatric Radiology        | 91.67%    | 22 |
| Pediatric Oncology         | 79.17%    | 19 |
| Pediatric Anesthesiologist | 95.83%    | 23 |
| Pediatric Pathology        | 83.33%    | 20 |
| Total Respondents: 24      |           |    |

# Q3: Logistics at your Institution:

Answered: 24   Skipped: 0

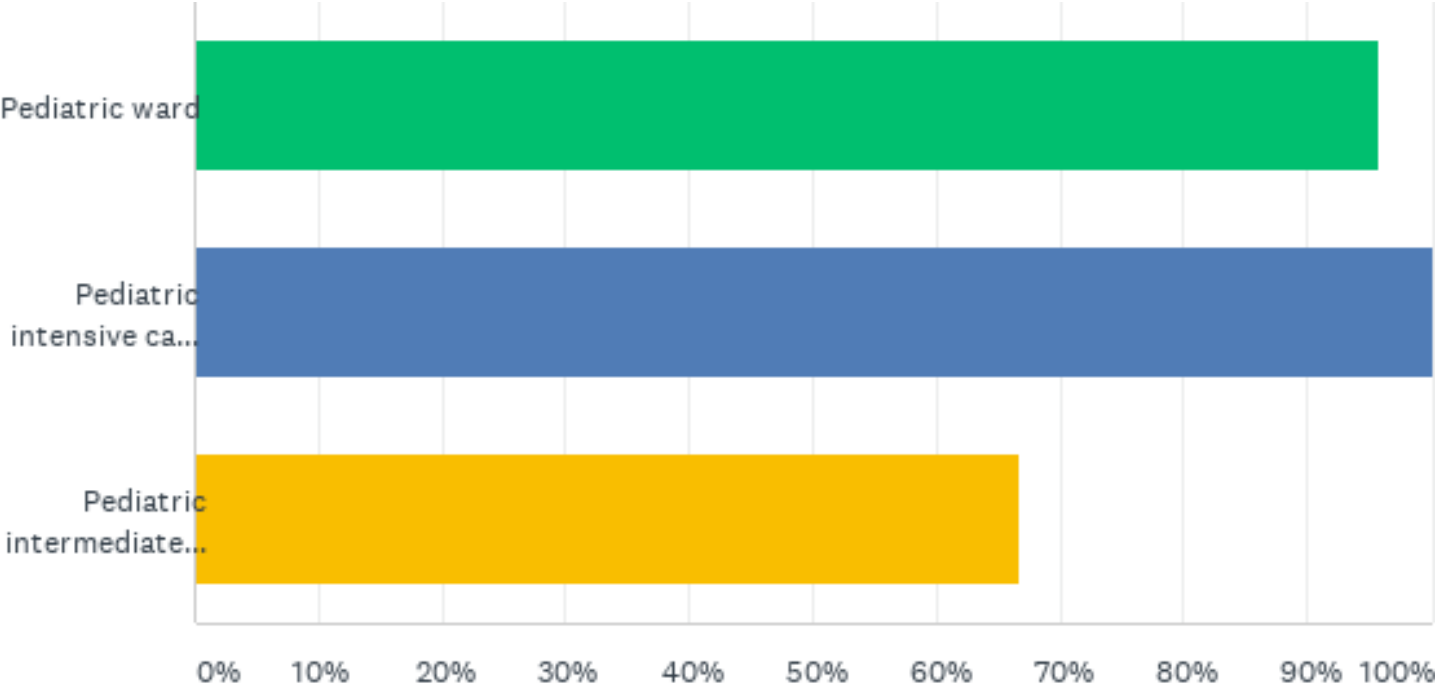

### Q3: Logistics at your Institution:

Answered: 24    Skipped: 0

| ANSWER CHOICES                   | RESPONSES |    |
|----------------------------------|-----------|----|
| Pediatric ward                   | 95.83%    | 23 |
| Pediatric intensive care unit    | 100.00%   | 24 |
| Pediatric intermediate care unit | 66.67%    | 16 |
| Total Respondents: 24            |           |    |

## Q6: Imaging facilities for children at your Institution:

Answered: 24 Skipped: 0

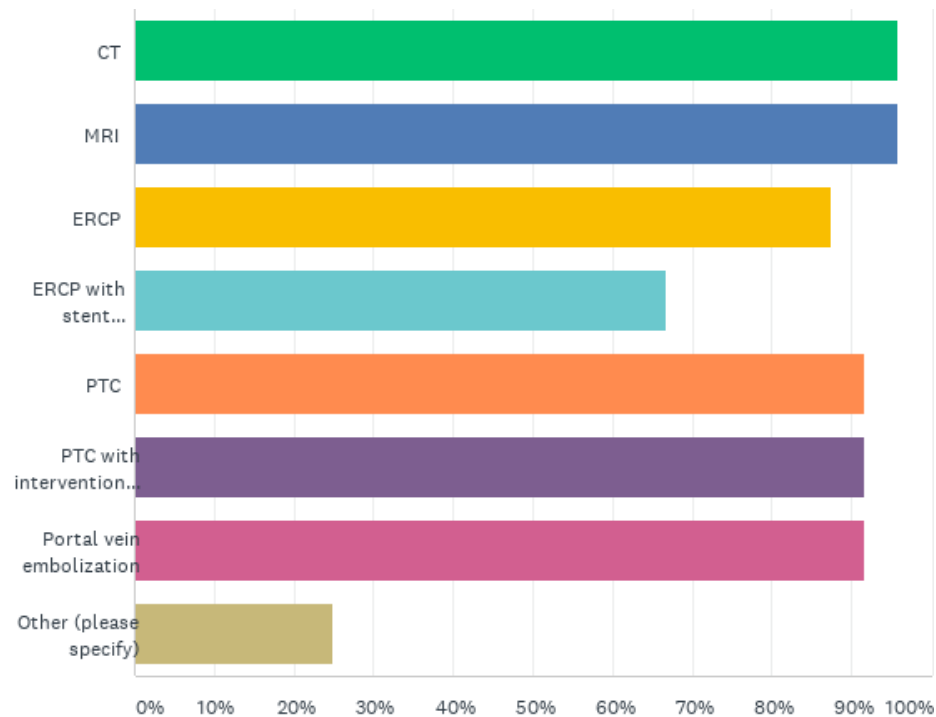

## Q6: Imaging facilities for children at your Institution:

Answered: 24 Skipped: 0

| ANSWER CHOICES                                     | RESPONSES |    |
|----------------------------------------------------|-----------|----|
| CT                                                 | 95.83%    | 23 |
| MRI                                                | 95.83%    | 23 |
| ERCP                                               | 87.50%    | 21 |
| ERCP with stent Implantation in infants            | 66.67%    | 16 |
| PTC                                                | 91.67%    | 22 |
| PTC with interventions (e.g. Dilatation, stenting) | 91.67%    | 22 |
| Portal vein embolization                           | 91.67%    | 22 |
| Other (please specify)                             | 25.00%    | 6  |
| Total Respondents: 24                              |           |    |



## Q7: Reason for liver resection:

Answered: 23 Skipped: 1

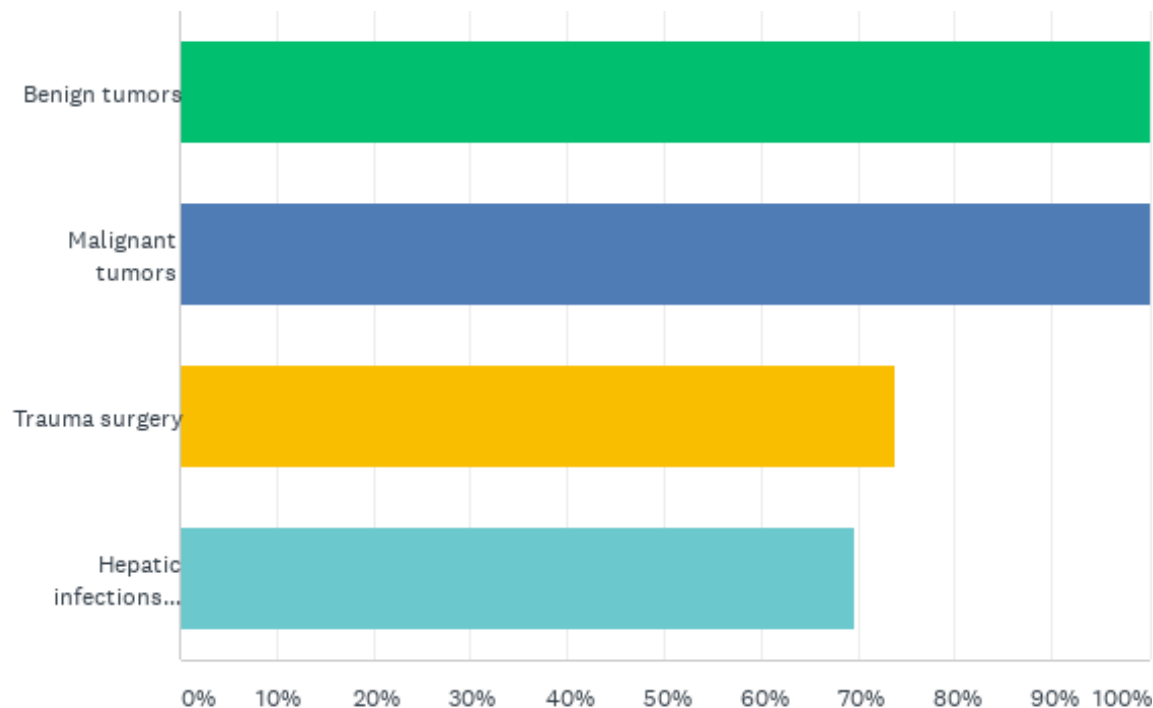

# Q7: Reason for liver resection:

Answered: 23    Skipped: 1

| ANSWER CHOICES                              | RESPONSES |    |
|---------------------------------------------|-----------|----|
| Benign tumors                               | 100.00%   | 23 |
| Malignant tumors                            | 100.00%   | 23 |
| Trauma surgery                              | 73.91%    | 17 |
| Hepatic infections (abscess, hydatid cysts) | 69.57%    | 16 |
| Total Respondents: 23                       |           |    |

## Q8: Tumor Type:

Answered: 23 Skipped: 1

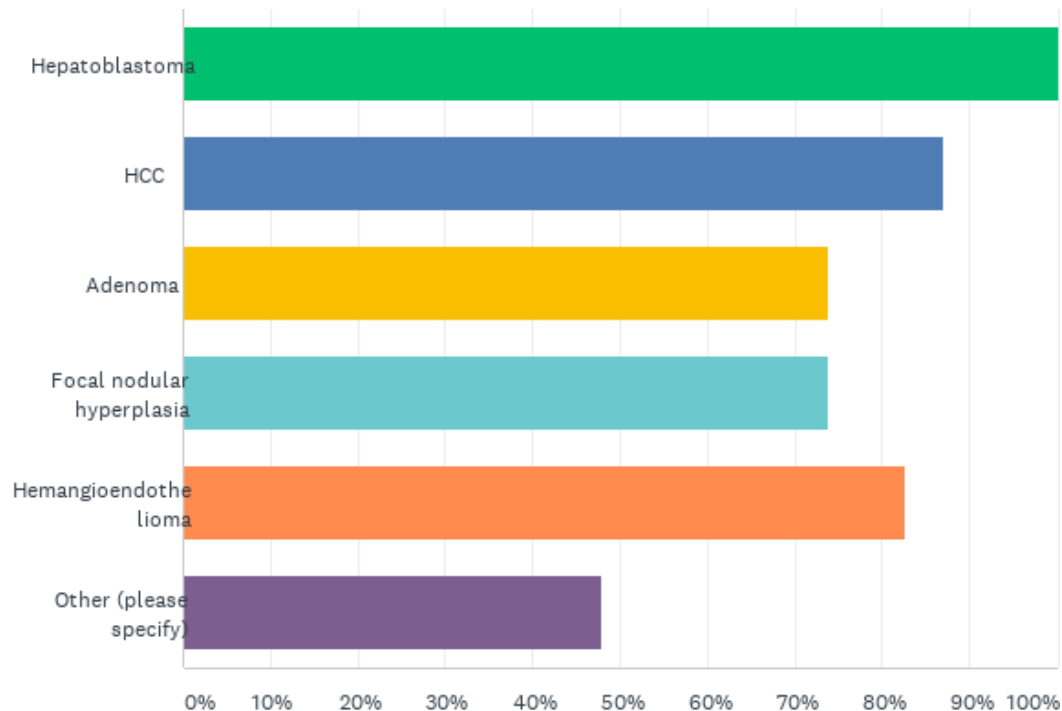

# Q8: Tumor Type:

Answered: 23    Skipped: 1

| ANSWER CHOICES            | RESPONSES |    |
|---------------------------|-----------|----|
| Hepatoblastoma            | 100.00%   | 23 |
| HCC                       | 86.96%    | 20 |
| Adenoma                   | 73.91%    | 17 |
| Focal nodular hyperplasia | 73.91%    | 17 |
| Hemangioendothelioma      | 82.61%    | 19 |
| Other (please specify)    | 47.83%    | 11 |
| Total Respondents: 23     |           |    |

# Q9: Operation performed by (multiple entries possible):

Answered: 23    Skipped: 1

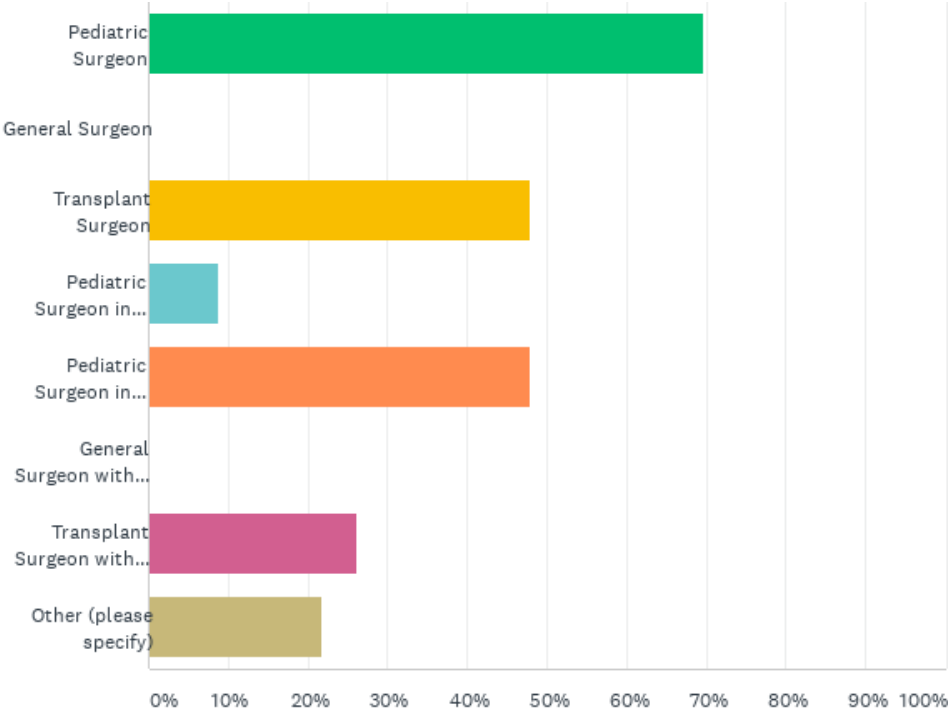

## Q9: Operation performed by (multiple entries possible):

Answered: 23   Skipped: 1

| ANSWER CHOICES                                           | RESPONSES |    |
|----------------------------------------------------------|-----------|----|
| Pediatric Surgeon                                        | 69.57%    | 16 |
| General Surgeon                                          | 0.00%     | 0  |
| Transplant Surgeon                                       | 47.83%    | 11 |
| Pediatric Surgeon in cooperation with General Surgeon    | 8.70%     | 2  |
| Pediatric Surgeon in cooperation with Transplant Surgeon | 47.83%    | 11 |
| General Surgeon with assistance by Pediatric Surgeon     | 0.00%     | 0  |
| Transplant Surgeon with assistance by Pediatric Surgeon  | 26.09%    | 6  |
| Other (please specify)                                   | 21.74%    | 5  |
| Total Respondents: 23                                    |           |    |

## Q10: Type of exposition

Answered: 23 Skipped: 1

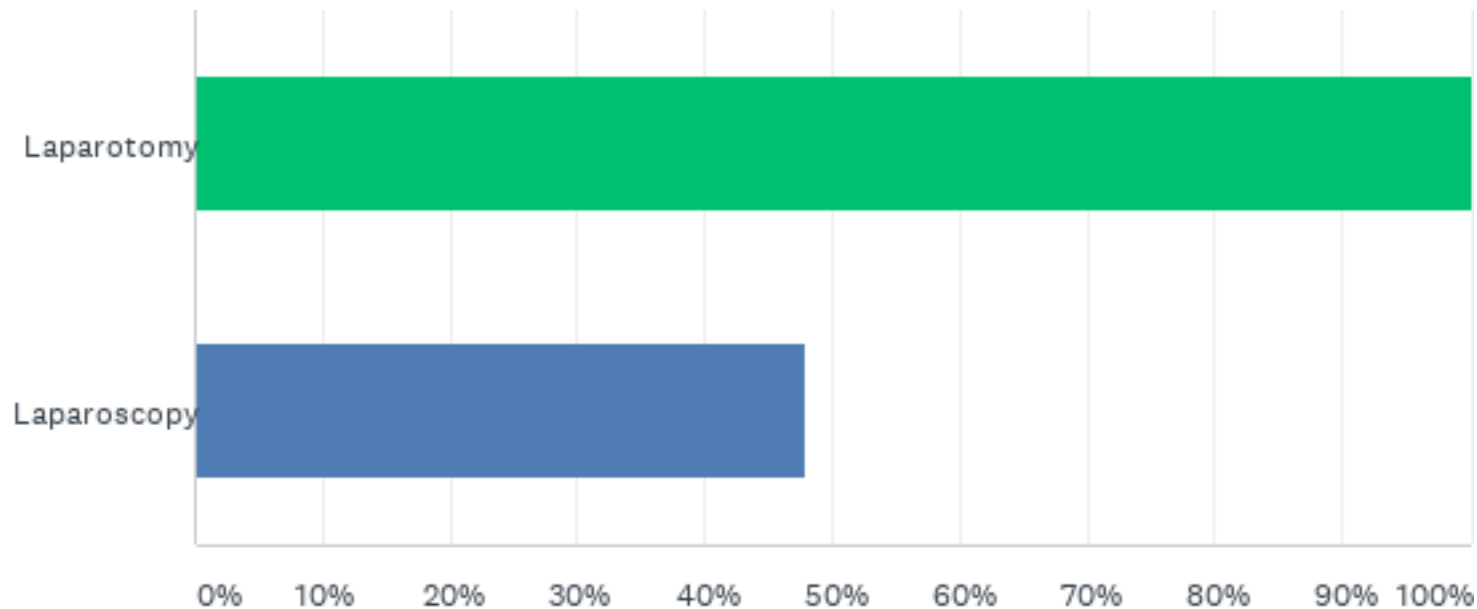

# Q10: Type of exposition

Answered: 23    Skipped: 1

| ANSWER CHOICES        | RESPONSES |    |
|-----------------------|-----------|----|
| Laparotomy            | 100.00%   | 23 |
| Laparoscopy           | 47.83%    | 11 |
| Total Respondents: 23 |           |    |



## Q11: Type of laparotomy

Answered: 22 Skipped: 2

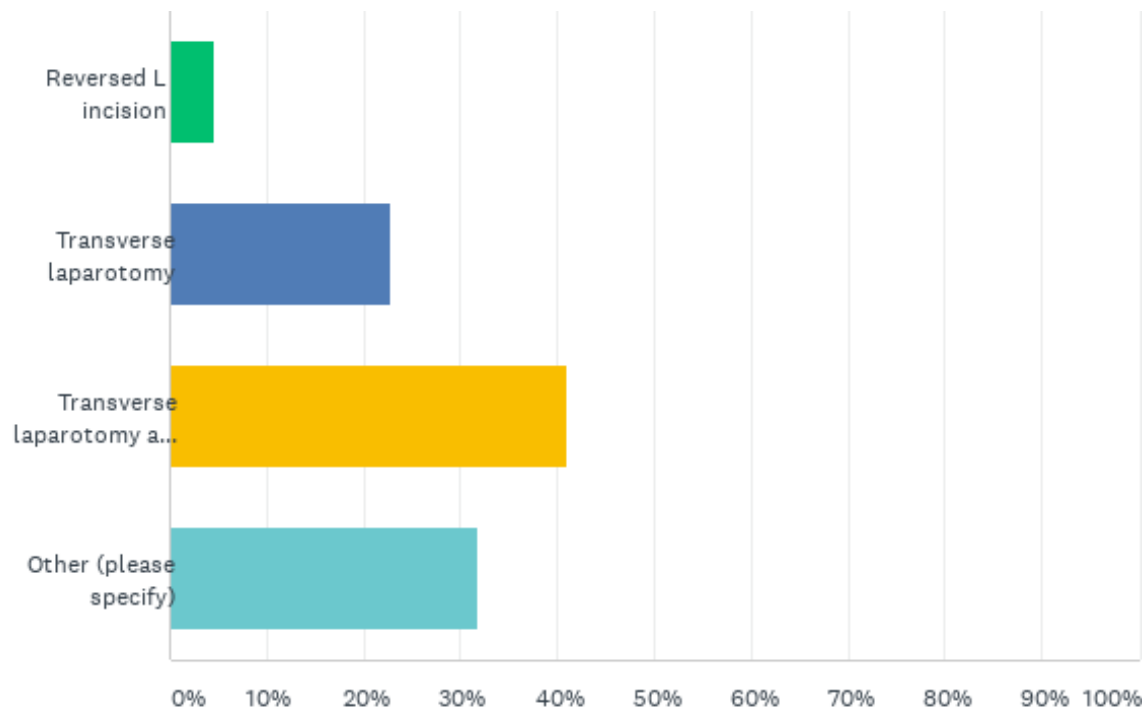

## Q11: Type of laparotomy

Answered: 22 Skipped: 2

| ANSWER CHOICES                                    | RESPONSES |    |
|---------------------------------------------------|-----------|----|
| Reversed L incision                               | 4.55%     | 1  |
| Transverse laparotomy                             | 22.73%    | 5  |
| Transverse laparotomy and cranial median incision | 40.91%    | 9  |
| Other (please specify)                            | 31.82%    | 7  |
| TOTAL                                             |           | 22 |

# Q12: Procedures performed at your Institution:

Answered: 23    Skipped: 1

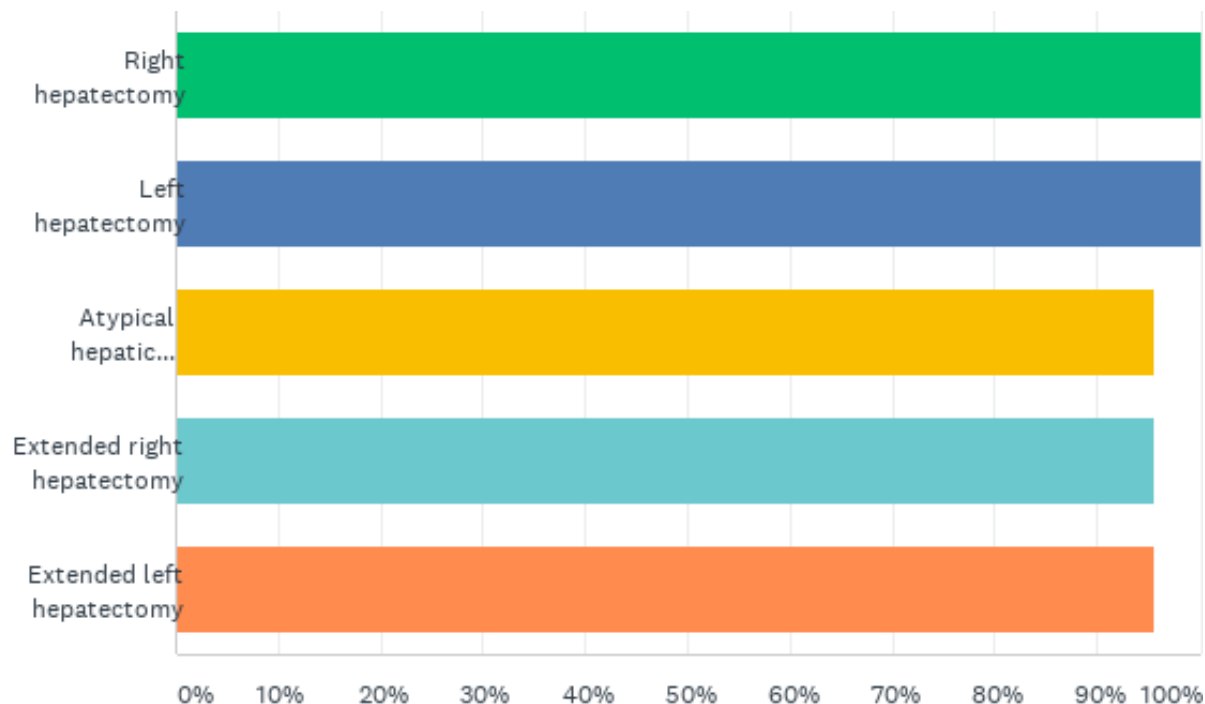

# Q12: Procedures performed at your Institution:

Answered: 23    Skipped: 1

| ANSWER CHOICES              | RESPONSES |    |
|-----------------------------|-----------|----|
| Right hepatectomy           | 100.00%   | 23 |
| Left hepatectomy            | 100.00%   | 23 |
| Atypical hepatic resections | 95.65%    | 22 |
| Extended right hepatectomy  | 95.65%    | 22 |
| Extended left hepatectomy   | 95.65%    | 22 |
| Total Respondents: 23       |           |    |

## Q13: Vascular exclusion:

Answered: 22 Skipped: 2

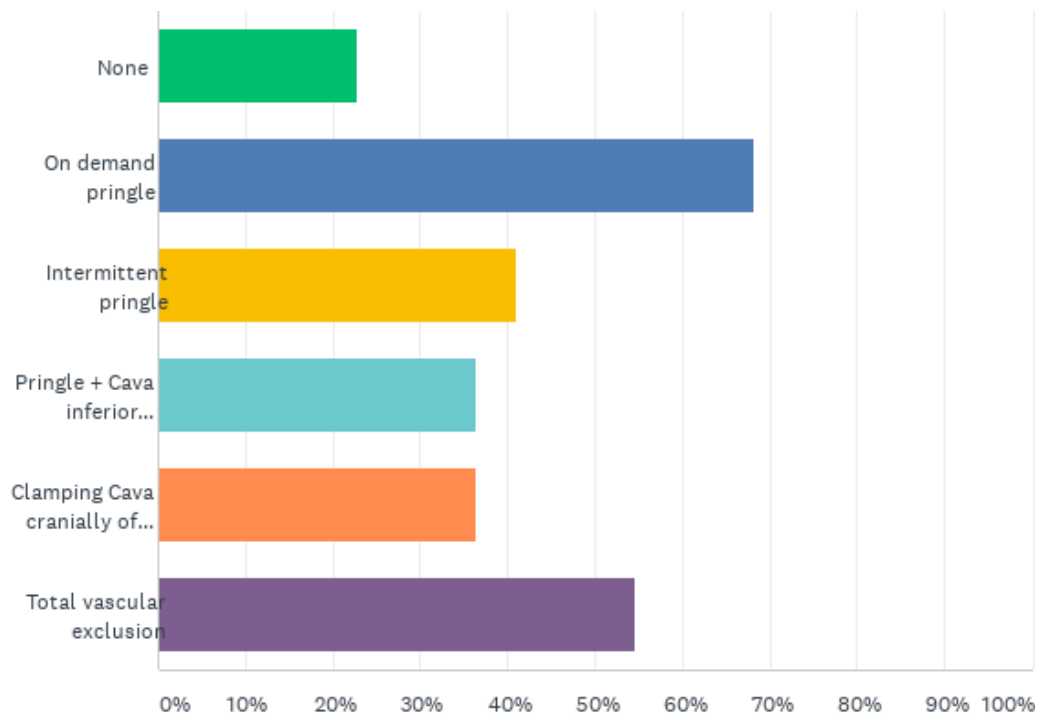

## Q13: Vascular exclusion:

Answered: 22   Skipped: 2

| ANSWER CHOICES                       | RESPONSES |    |
|--------------------------------------|-----------|----|
| None                                 | 22.73%    | 5  |
| On demand pringle                    | 68.18%    | 15 |
| Intermittent pringle                 | 40.91%    | 9  |
| Pringle + Cava inferior clamping     | 36.36%    | 8  |
| Clamping Cava cranially of the liver | 36.36%    | 8  |
| Total vascular exclusion             | 54.55%    | 12 |
| Total Respondents: 22                |           |    |

## Q14: Parenchymal dissection technique:

Answered: 22 Skipped: 2

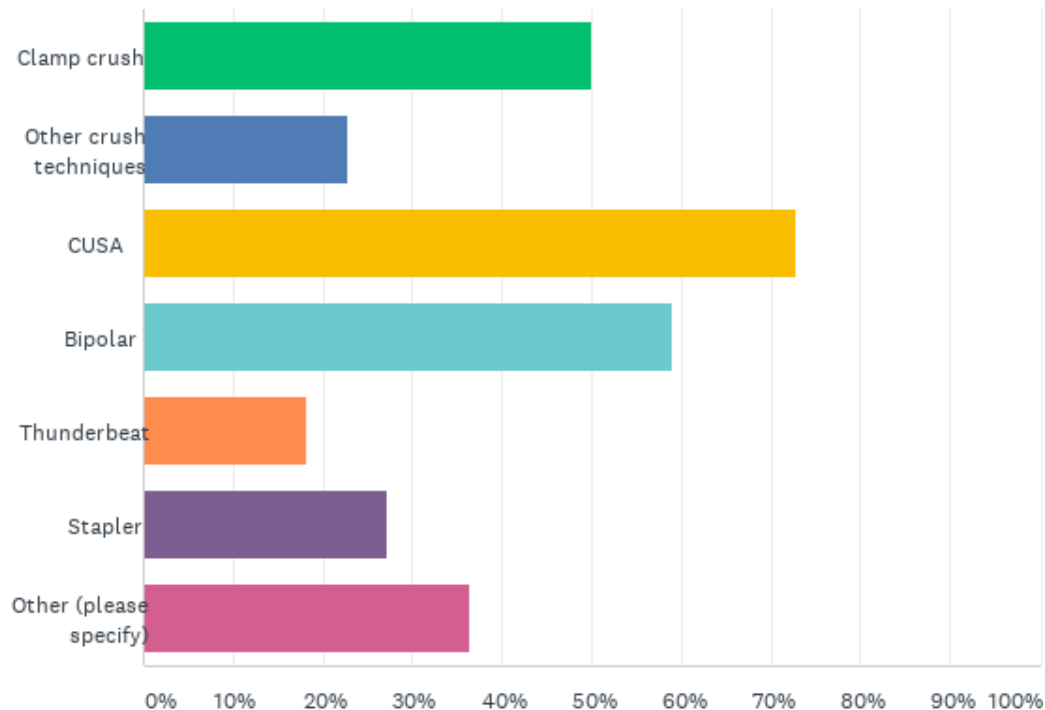

## Q14: Parenchymal dissection technique:

Answered: 22 Skipped: 2

| ANSWER CHOICES         | RESPONSES |    |
|------------------------|-----------|----|
| Clamp crush            | 50.00%    | 11 |
| Other crush techniques | 22.73%    | 5  |
| CUSA                   | 72.73%    | 16 |
| Bipolar                | 59.09%    | 13 |
| Thunderbeat            | 18.18%    | 4  |
| Stapler                | 27.27%    | 6  |
| Other (please specify) | 36.36%    | 8  |
| Total Respondents: 22  |           |    |



# Q15: Drains:

Answered: 23   Skipped: 1

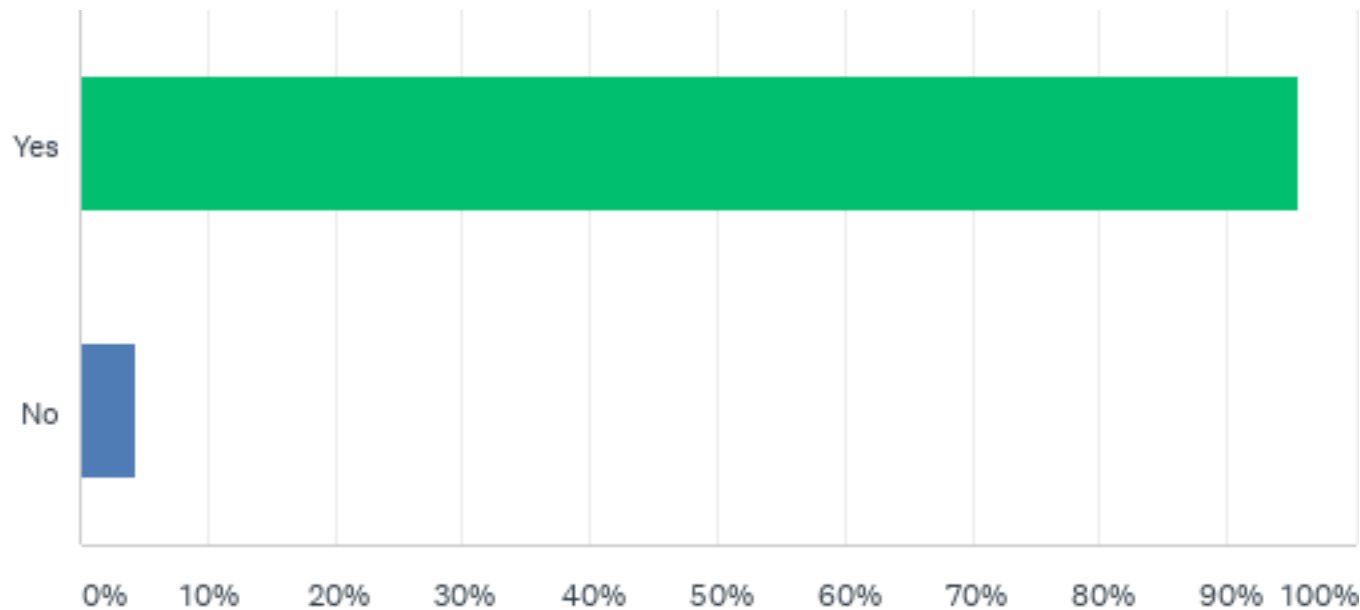

# Q15: Drains:

Answered: 23    Skipped: 1

| ANSWER CHOICES | RESPONSES |    |
|----------------|-----------|----|
| Yes            | 95.65%    | 22 |
| No             | 4.35%     | 1  |
| TOTAL          |           | 23 |

## Q17: Oncological Management:

Answered: 23 Skipped: 1

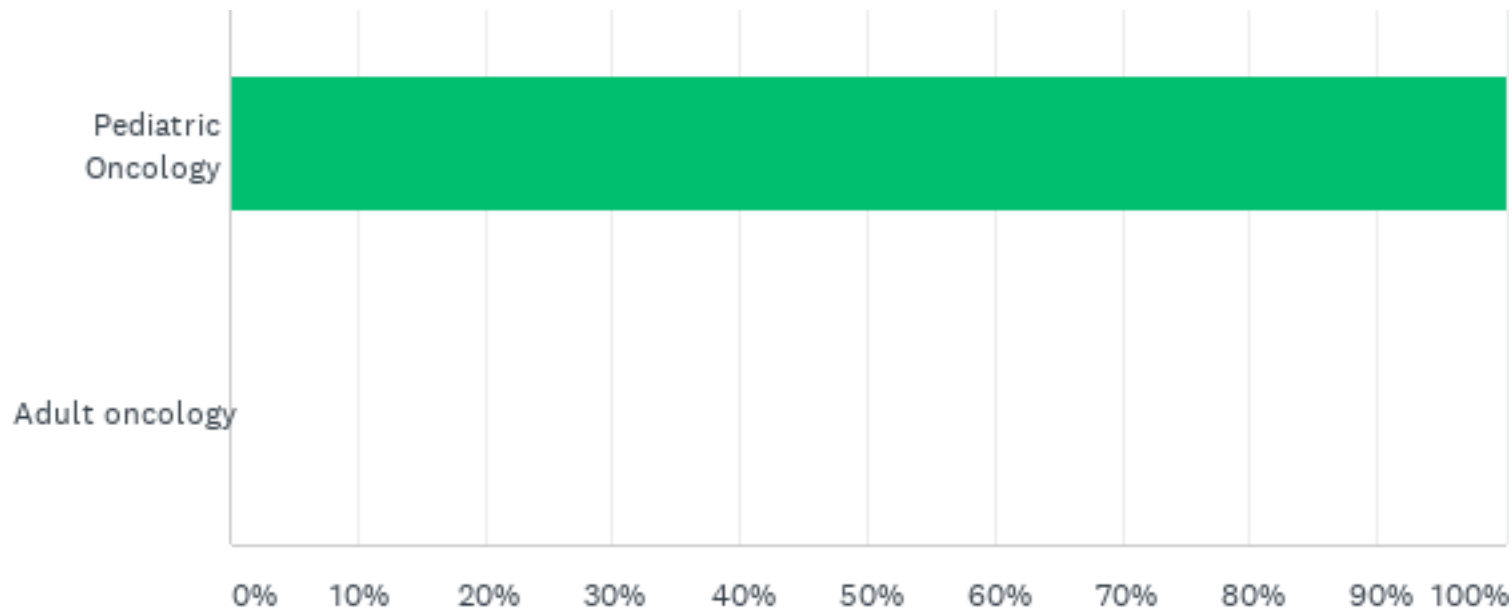

# Q17: Oncological Management:

Answered: 23    Skipped: 1

| ANSWER CHOICES     | RESPONSES |    |
|--------------------|-----------|----|
| Pediatric Oncology | 100.00%   | 23 |
| Adult oncology     | 0.00%     | 0  |
| TOTAL              |           | 23 |

# Q18: Decision making by:

Answered: 23   Skipped: 1

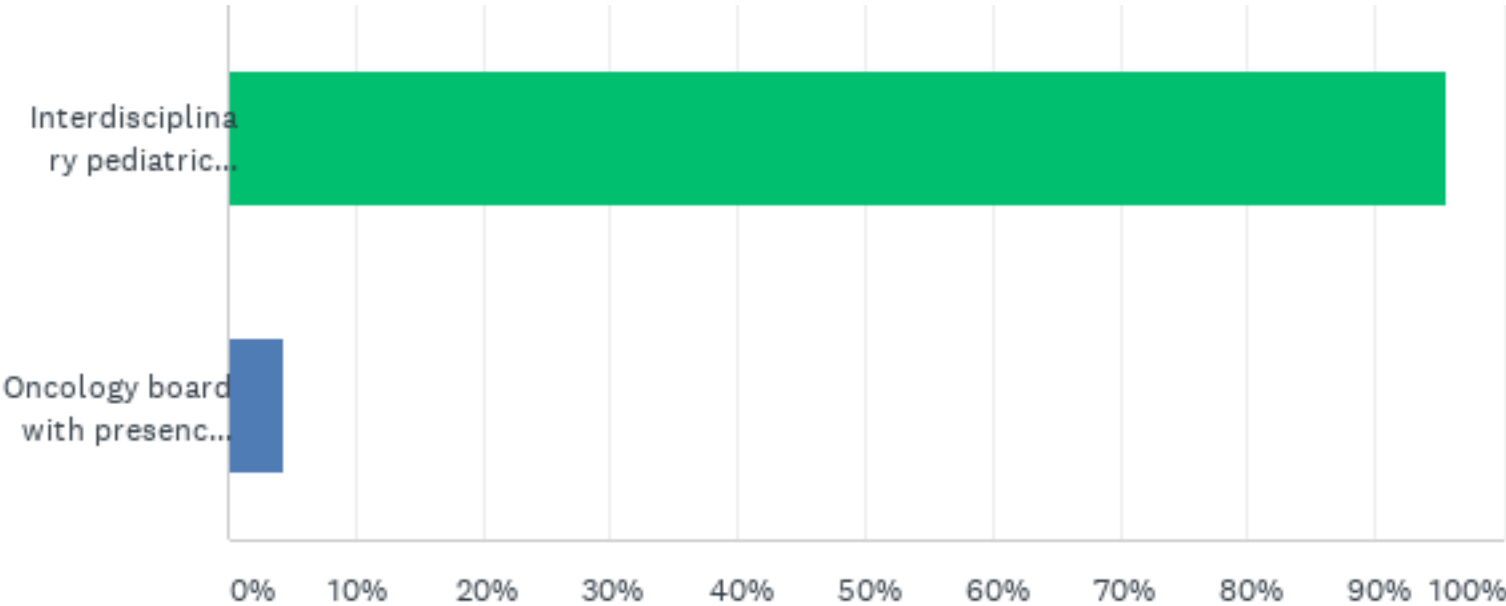

# Q18: Decision making by:

Answered: 23    Skipped: 1

| ANSWER CHOICES                                   | RESPONSES |    |
|--------------------------------------------------|-----------|----|
| Interdisciplinary pediatric oncology board       | 95.65%    | 22 |
| Oncology board with presence of General surgeons | 4.35%     | 1  |
| TOTAL                                            |           | 23 |

# Q19: Chemotherapy performed at:

Answered: 23   Skipped: 1

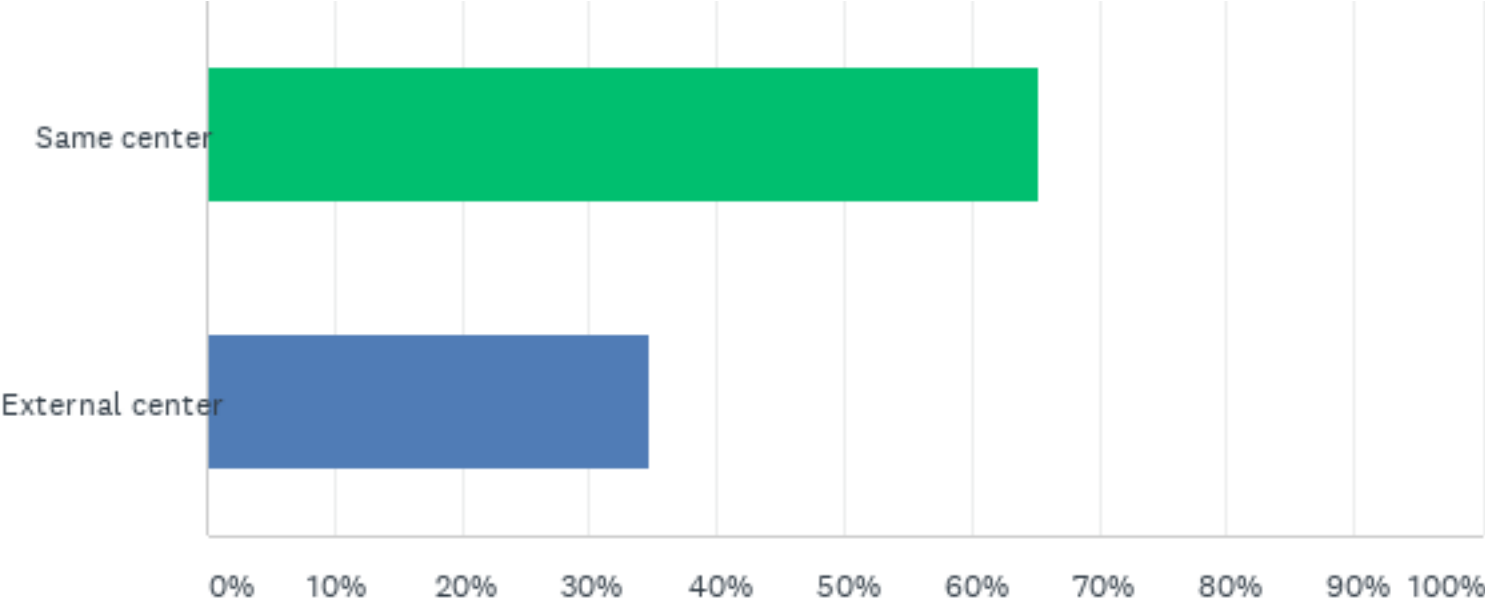

# Q19: Chemotherapy performed at:

Answered: 23    Skipped: 1

| ANSWER CHOICES  | RESPONSES |    |
|-----------------|-----------|----|
| Same center     | 65.22%    | 15 |
| External center | 34.78%    | 8  |
| TOTAL           |           | 23 |



## Q25: In our Center we perform pediatric liver transplantation

Answered: 23 Skipped: 1

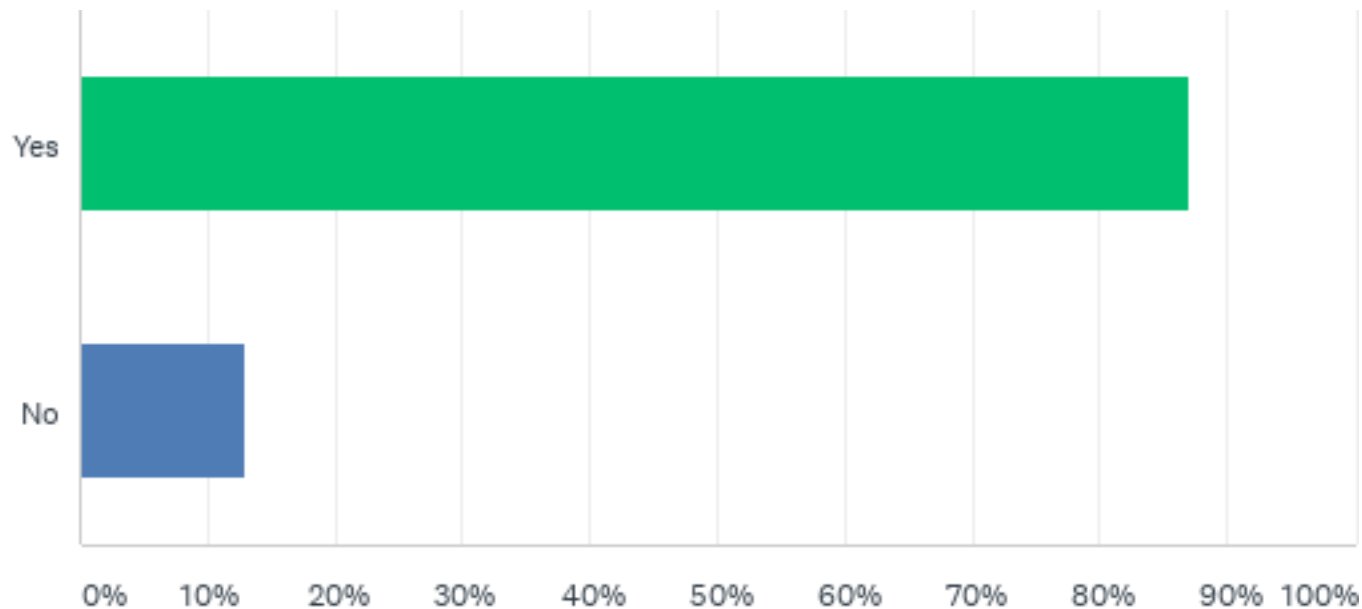

# Q25: In our Center we perform pediatric liver transplantation

Answered: 23    Skipped: 1

| ANSWER CHOICES | RESPONSES |    |
|----------------|-----------|----|
| Yes            | 86.96%    | 20 |
| No             | 13.04%    | 3  |
| TOTAL          |           | 23 |

## Q26: Transplantations are performed by:

Answered: 21 Skipped: 3

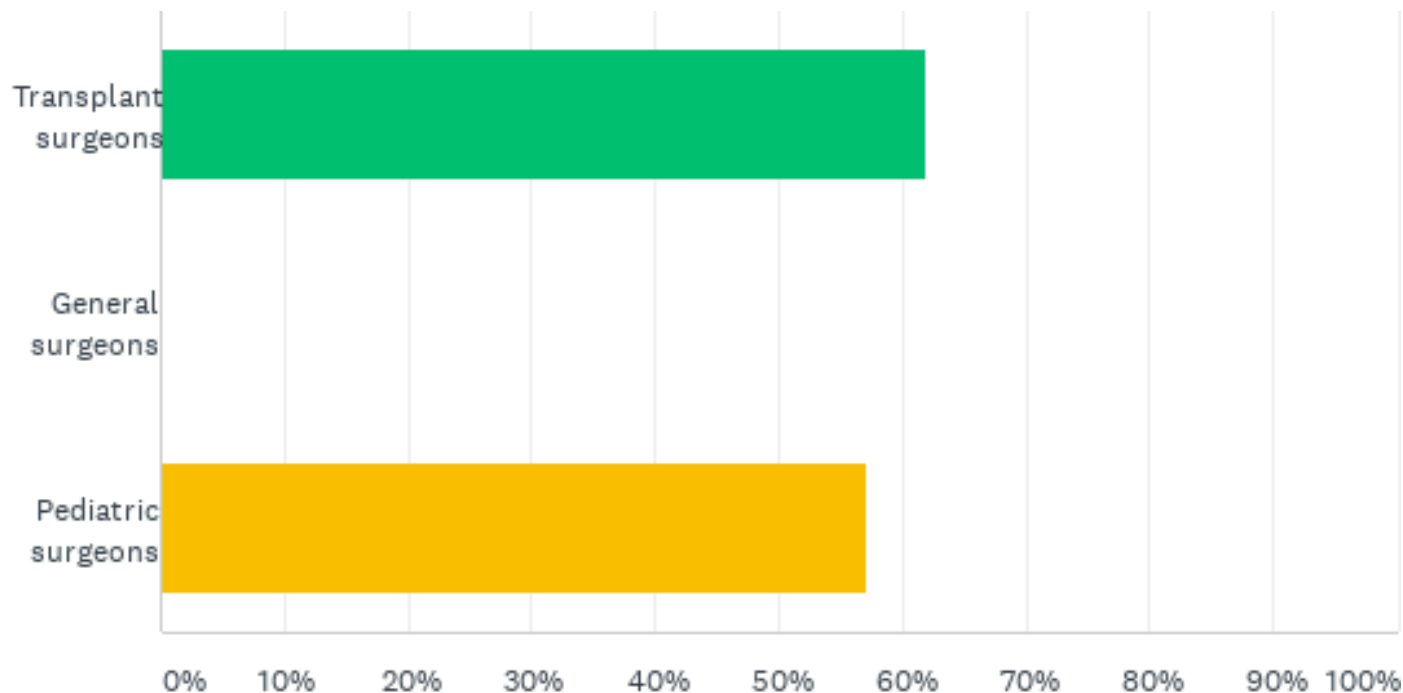

# Q26: Transplantations are performed by:

Answered: 21    Skipped: 3

| ANSWER CHOICES        | RESPONSES |    |
|-----------------------|-----------|----|
| Transplant surgeons   | 61.90%    | 13 |
| General surgeons      | 0.00%     | 0  |
| Pediatric surgeons    | 57.14%    | 12 |
| Total Respondents: 21 |           |    |

## Q27: Post transplant management is performed by:

Answered: 21 Skipped: 3

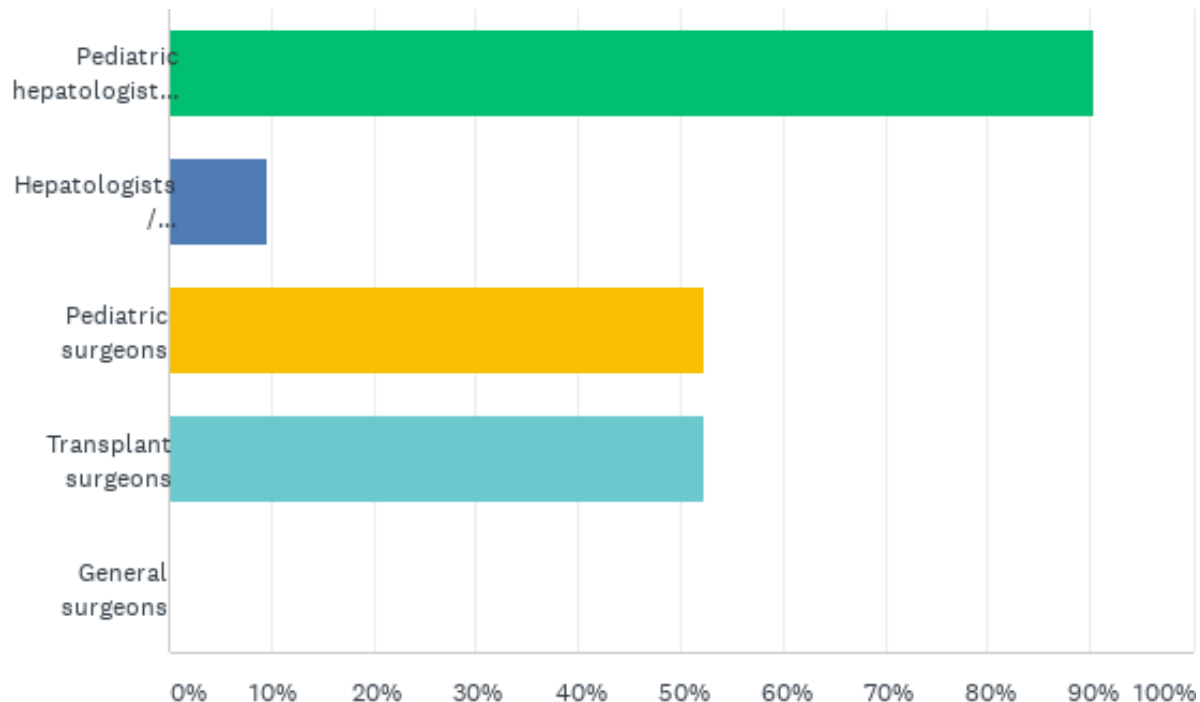

# Q27: Post transplant management is performed by:

Answered: 21    Skipped: 3

| ANSWER CHOICES                                | RESPONSES |    |
|-----------------------------------------------|-----------|----|
| Pediatric hepatologists / gastroenterologists | 90.48%    | 19 |
| Hepatologists / Gastroenterologists           | 9.52%     | 2  |
| Pediatric surgeons                            | 52.38%    | 11 |
| Transplant surgeons                           | 52.38%    | 11 |
| General surgeons                              | 0.00%     | 0  |
| Total Respondents: 21                         |           |    |

## Q28: The transplant program includes:

Answered: 20 Skipped: 4

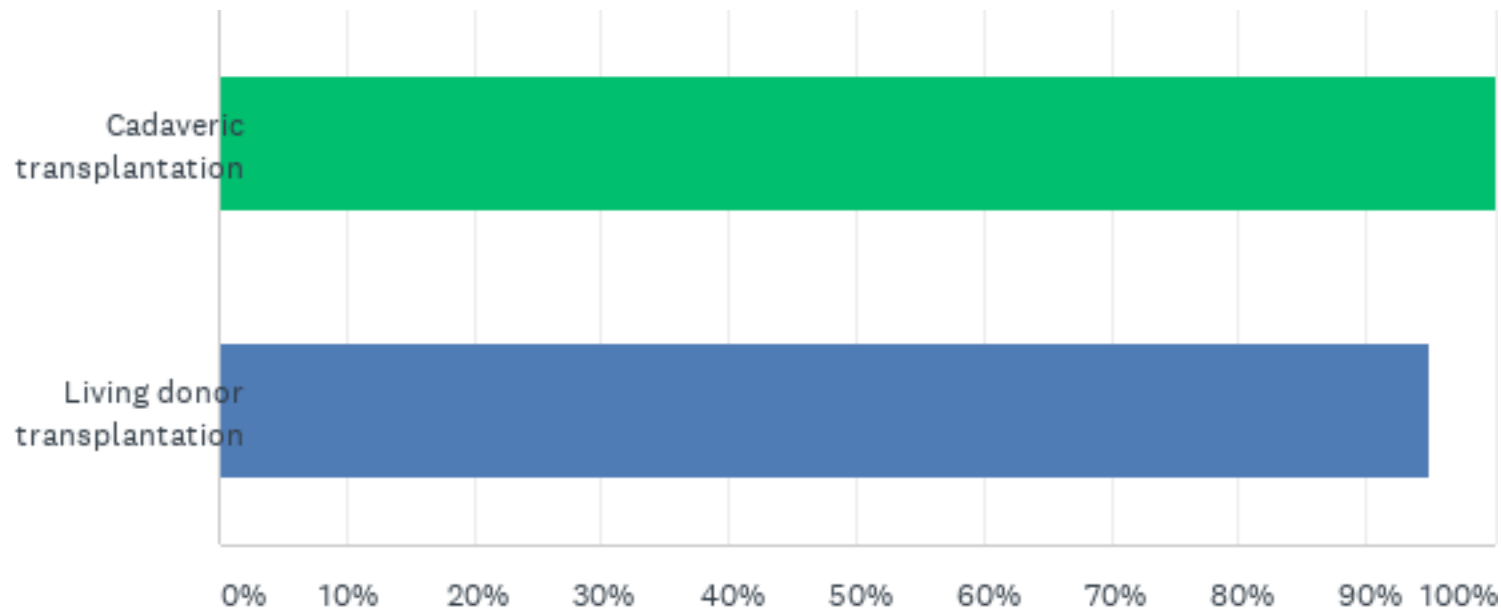

# Q28: The transplant program includes:

Answered: 20    Skipped: 4

| ANSWER CHOICES               | RESPONSES |    |
|------------------------------|-----------|----|
| Cadaveric transplantation    | 100.00%   | 20 |
| Living donor transplantation | 95.00%    | 19 |
| Total Respondents: 20        |           |    |



## Q29: For cadaveric transplantation:

Answered: 20 Skipped: 4

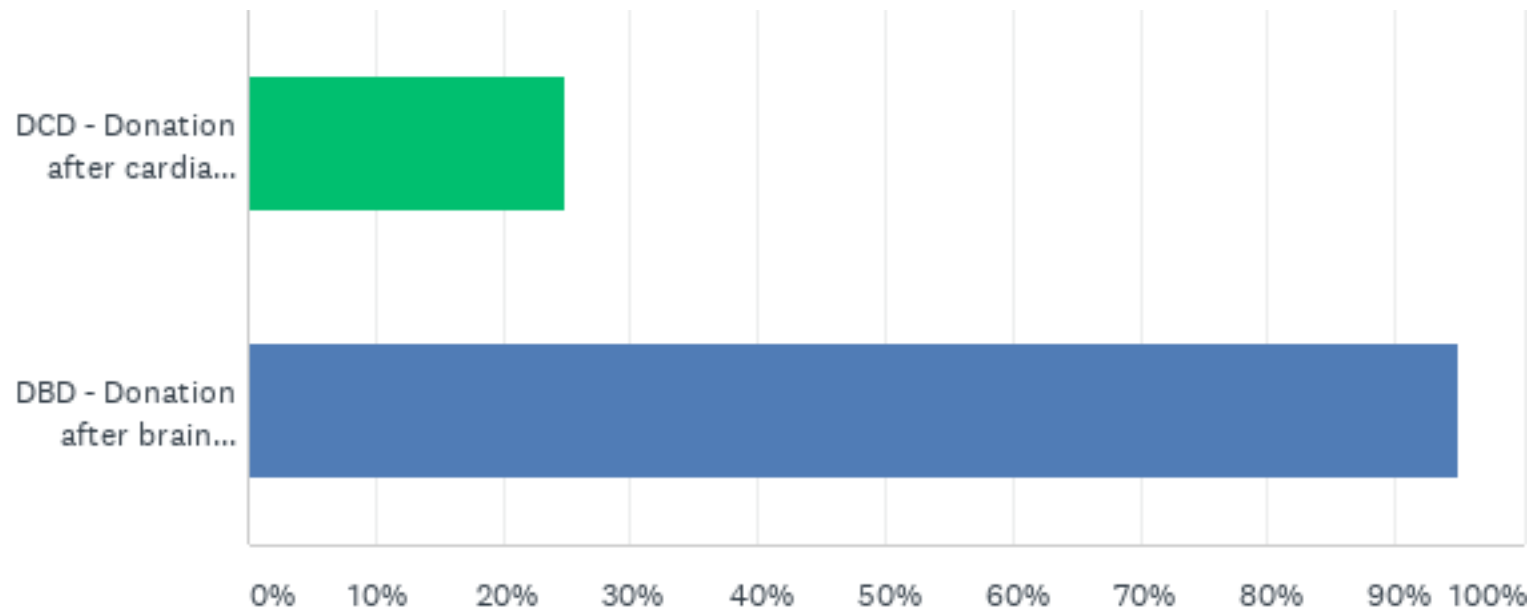

# Q29: For cadaveric transplantation:

Answered: 20    Skipped: 4

| ANSWER CHOICES                     | RESPONSES |    |
|------------------------------------|-----------|----|
| DCD - Donation after cardiac death | 25.00%    | 5  |
| DBD - Donation after brain death   | 95.00%    | 19 |
| Total Respondents: 20              |           |    |

## Q30: Pediatric liver transplantation includes:

Answered: 20 Skipped: 4

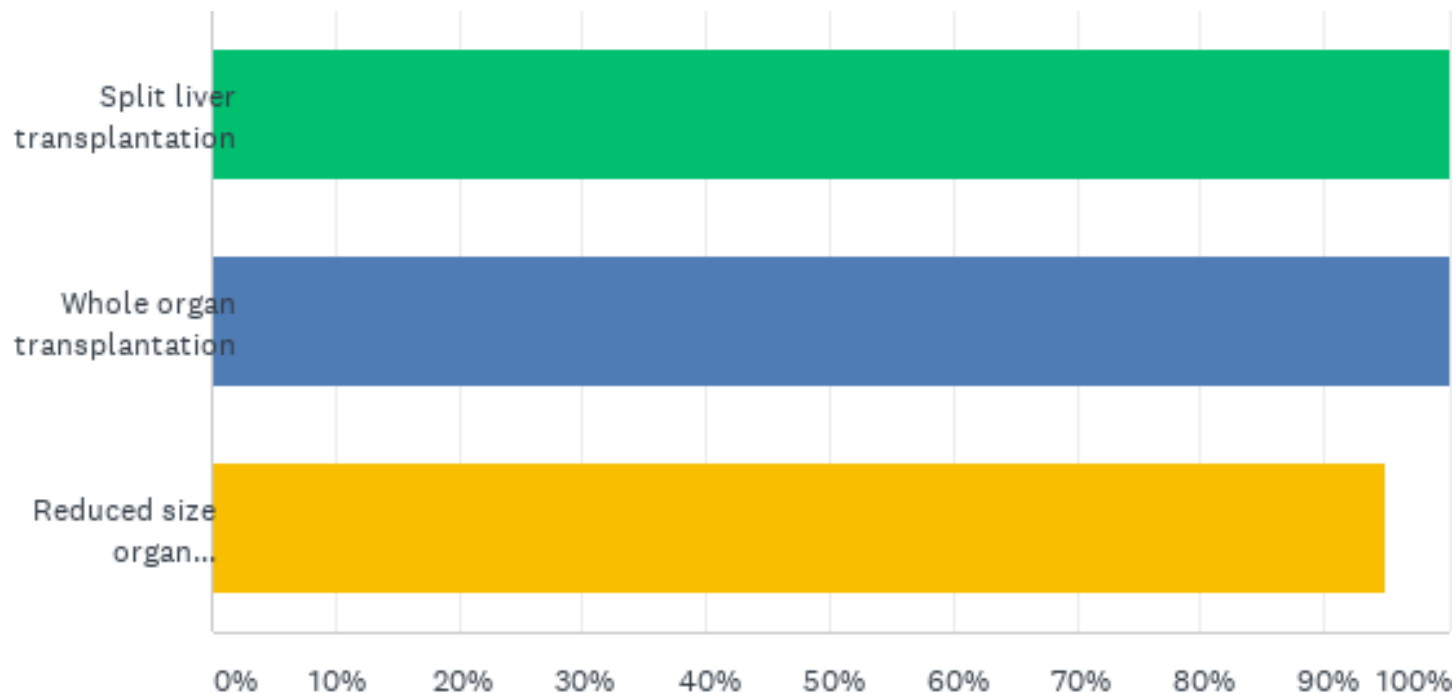

# Q30: Pediatric liver transplantation includes:

Answered: 20    Skipped: 4

| ANSWER CHOICES                     | RESPONSES |    |
|------------------------------------|-----------|----|
| Split liver transplantation        | 100.00%   | 20 |
| Whole organ transplantation        | 100.00%   | 20 |
| Reduced size organ transplantation | 95.00%    | 19 |
| Total Respondents: 20              |           |    |

## Q31: The pediatric Transplantation program includes:

Answered: 18 Skipped: 6

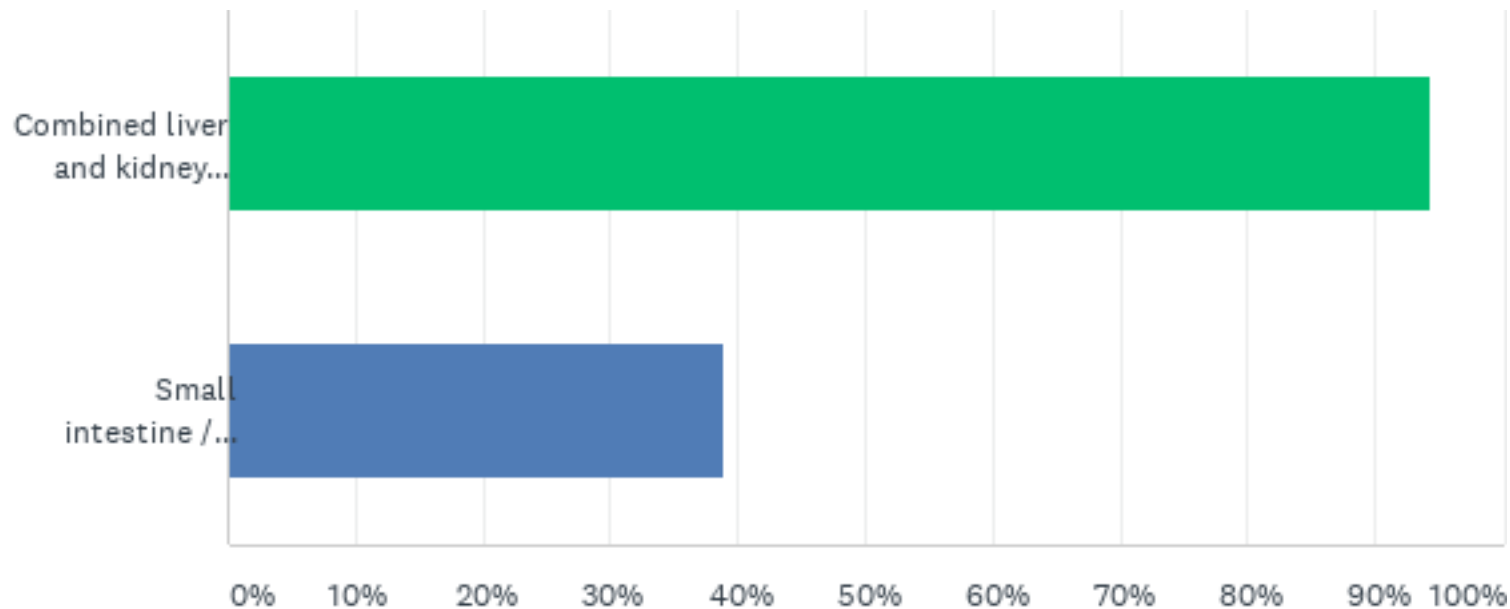

# Q31: The pediatric Transplantation program includes:

Answered: 18    Skipped: 6

| ANSWER CHOICES                                  | RESPONSES |    |
|-------------------------------------------------|-----------|----|
| Combined liver and kidney transplantation       | 94.44%    | 17 |
| Small intestine / multivisceral transplantation | 38.89%    | 7  |
| Total Respondents: 18                           |           |    |



---

# Delphi Questionnaire - Pediatric Liver Surgery and Transplantation

Tuesday, June 29, 2021



---

**9**  
Total Responses

Date Created: Friday, March 05, 2021

Complete Responses: 9

# Q1: Centers performing pediatric liver surgery should contain all necessary facilities for diagnostics (Sonography, CT, MRI)

Answered: 9 Skipped: 0

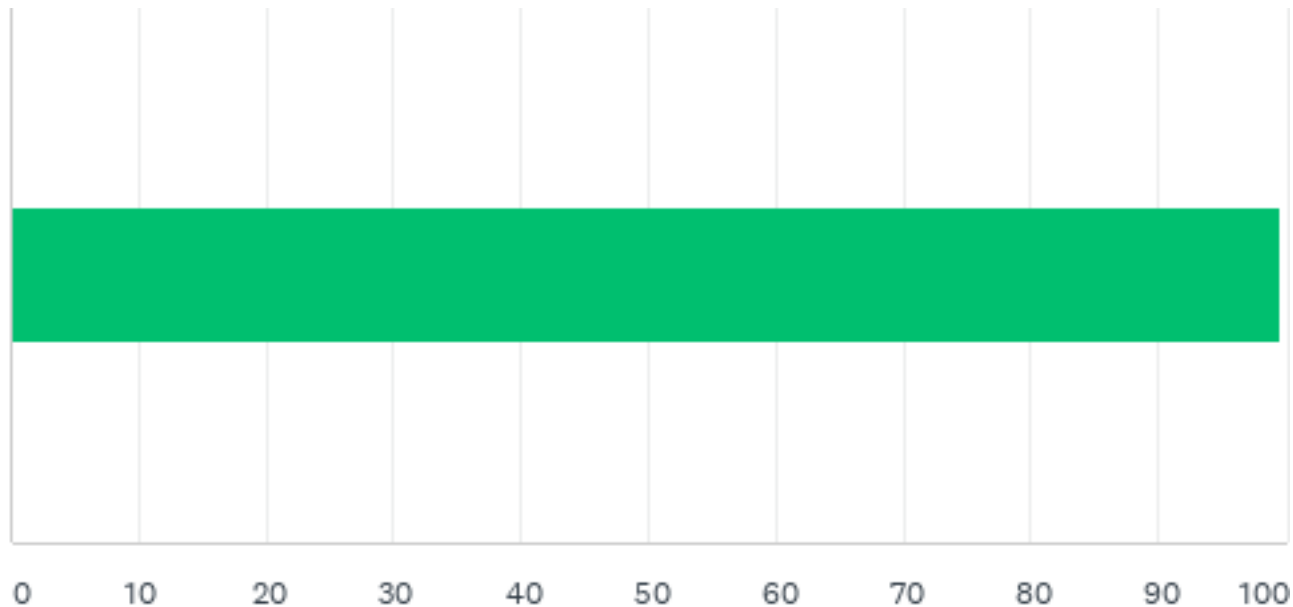

# Q1: Centers performing pediatric liver surgery should contain all necessary facilities for diagnostics (Sonography, CT, MRI)

Answered: 9   Skipped: 0

| ANSWER CHOICES       | AVERAGE NUMBER | TOTAL NUMBER | RESPONSES |
|----------------------|----------------|--------------|-----------|
|                      | 100            | 896          | 9         |
| Total Respondents: 9 |                |              |           |

## Q2: Centers performing pediatric liver surgery should contain all options for radiological interventions during diagnostics (biopsies)

Answered: 9 Skipped: 0

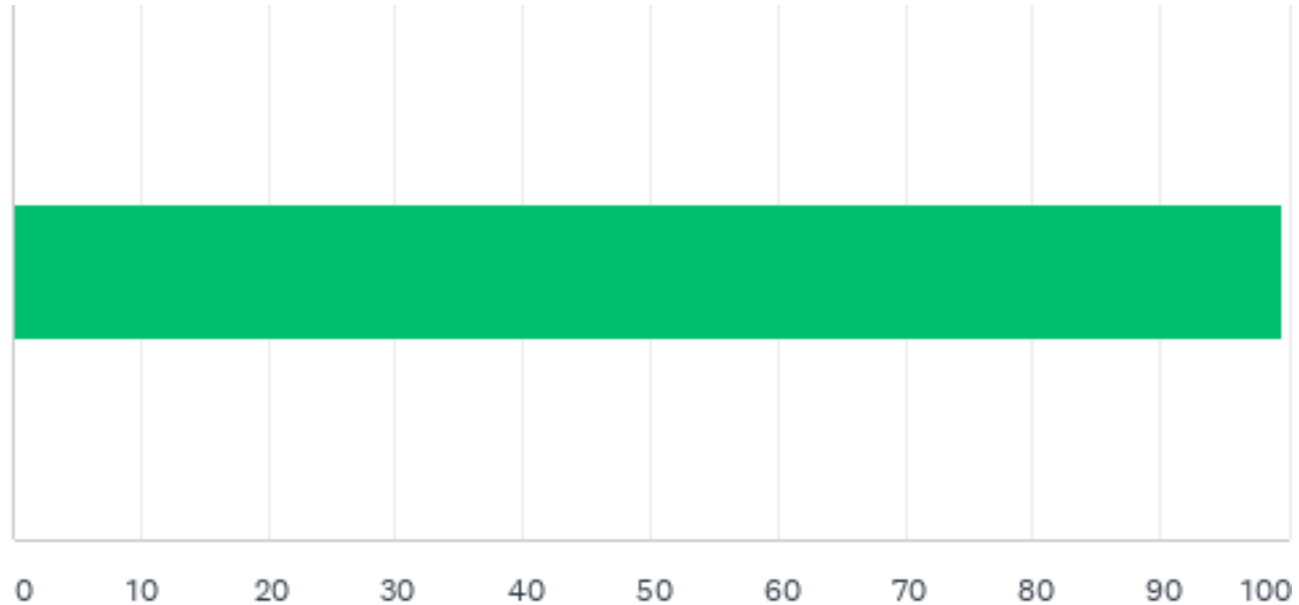

## Q2: Centers performing pediatric liver surgery should contain all options for radiological interventions during diagnostics (biopsies)

Answered: 9   Skipped: 0

| ANSWER CHOICES       | AVERAGE NUMBER | TOTAL NUMBER | RESPONSES |
|----------------------|----------------|--------------|-----------|
|                      | 100            | 896          | 9         |
| Total Respondents: 9 |                |              |           |

### Q3: Centers performing pediatric liver surgery need the facilities for preoperative radiological interventions (portal vein embolization)

Answered: 9 Skipped: 0

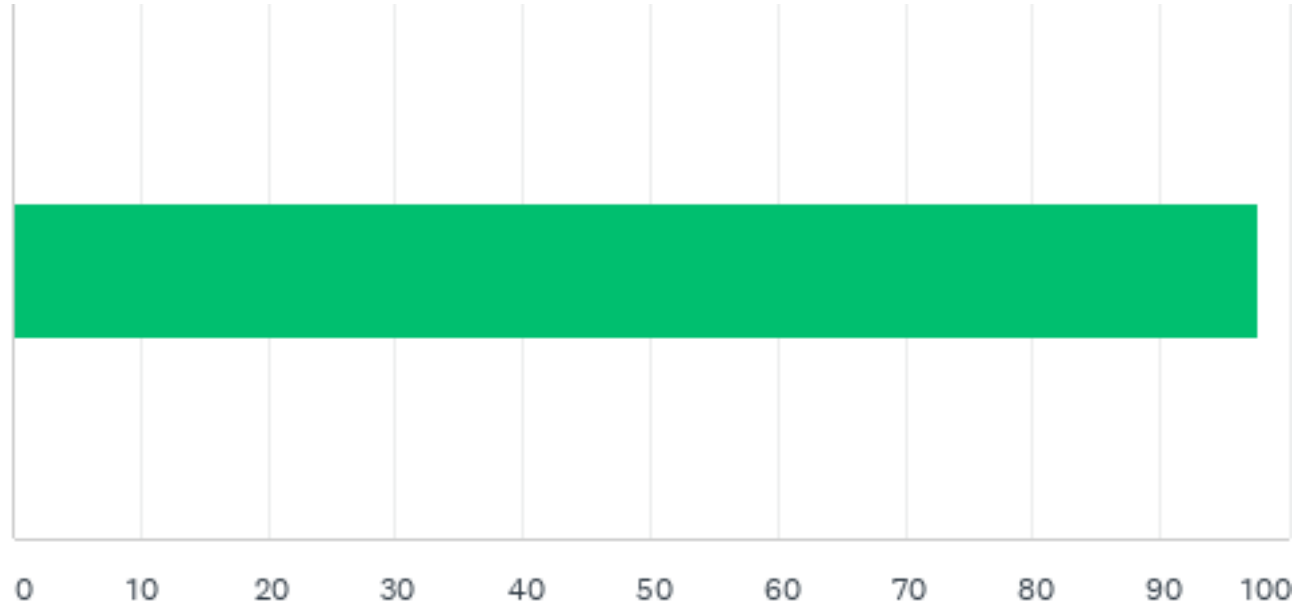

### Q3: Centers performing pediatric liver surgery need the facilities for preoperative radiological interventions (portal vein embolization)

Answered: 9    Skipped: 0

| ANSWER CHOICES       | AVERAGE NUMBER | TOTAL NUMBER | RESPONSES |
|----------------------|----------------|--------------|-----------|
|                      | 98             | 879          | 9         |
| Total Respondents: 9 |                |              |           |

## Q4: Centers performing pediatric liver surgery should contain the option for pre- and postoperative pediatric ERCP (with interventions)

Answered: 9 Skipped: 0

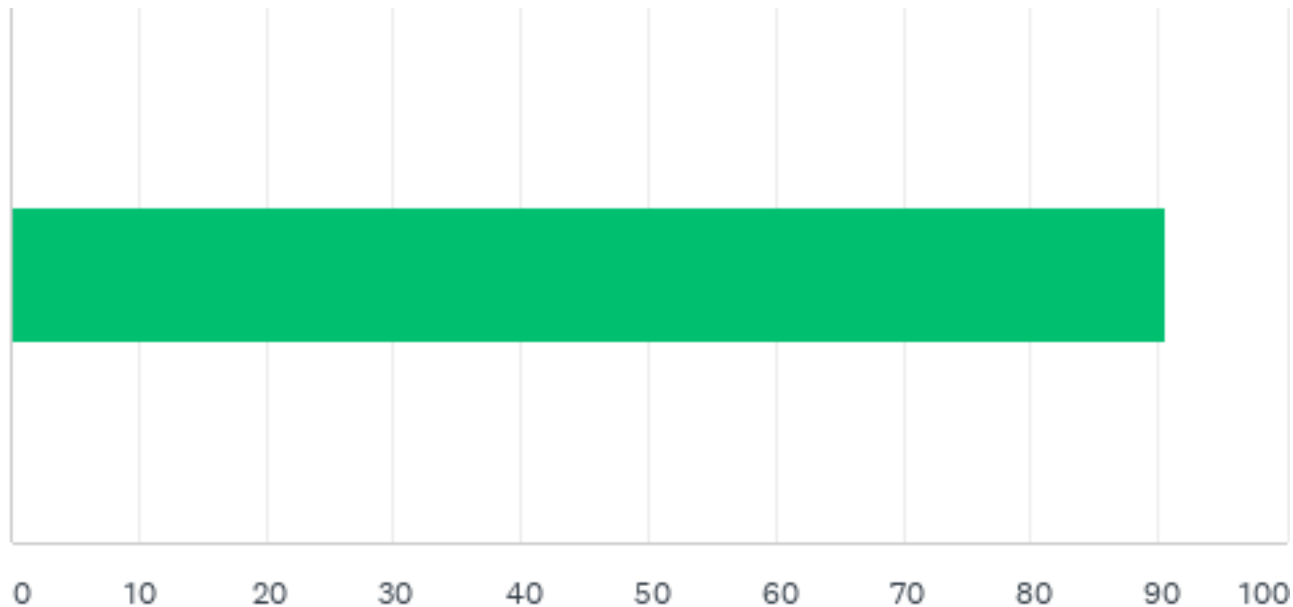



# Q4: Centers performing pediatric liver surgery should contain the option for pre- and postoperative pediatric ERCP (with interventions)

Answered: 9   Skipped: 0

| ANSWER CHOICES       | AVERAGE NUMBER | TOTAL NUMBER | RESPONSES |
|----------------------|----------------|--------------|-----------|
|                      | 91             | 815          | 9         |
| Total Respondents: 9 |                |              |           |

# Q5: Centers performing pediatric liver surgery should contain the option for pre- and postoperative PTC (with interventions)

Answered: 9   Skipped: 0

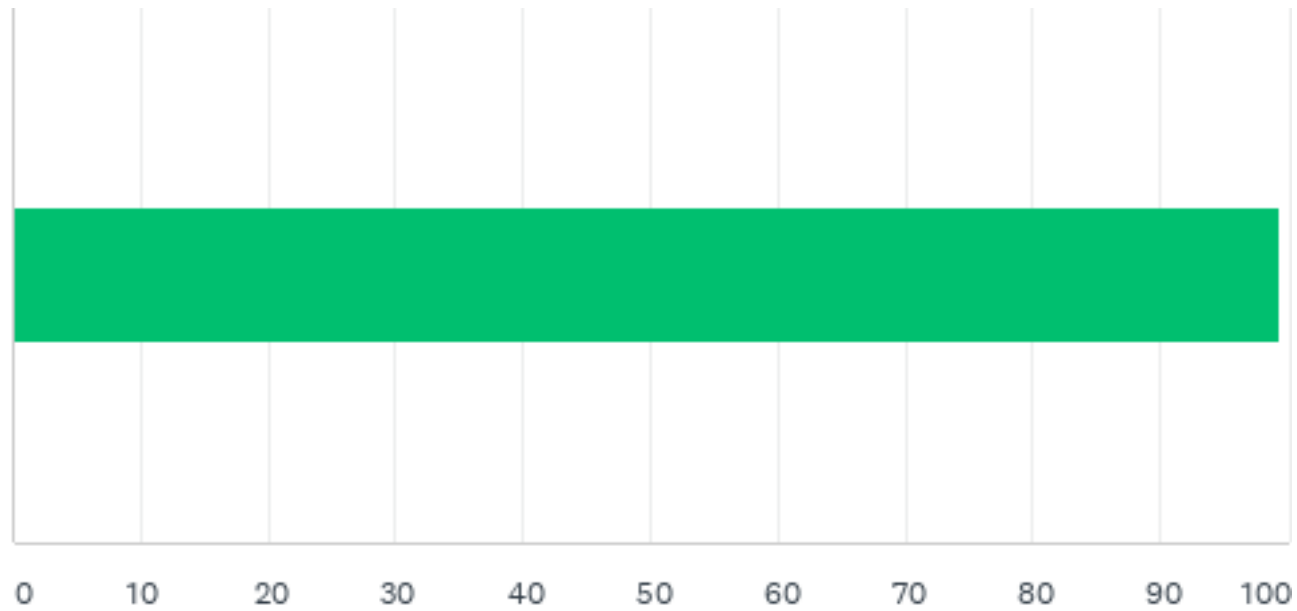

# Q5: Centers performing pediatric liver surgery should contain the option for pre- and postoperative PTC (with interventions)

Answered: 9   Skipped: 0

| ANSWER CHOICES       | AVERAGE NUMBER | TOTAL NUMBER | RESPONSES |
|----------------------|----------------|--------------|-----------|
|                      | 99             | 895          | 9         |
| Total Respondents: 9 |                |              |           |

## Q6: Pediatric liver surgery should rather be performed by transplant surgeons then by pediatric surgeons

Answered: 9 Skipped: 0

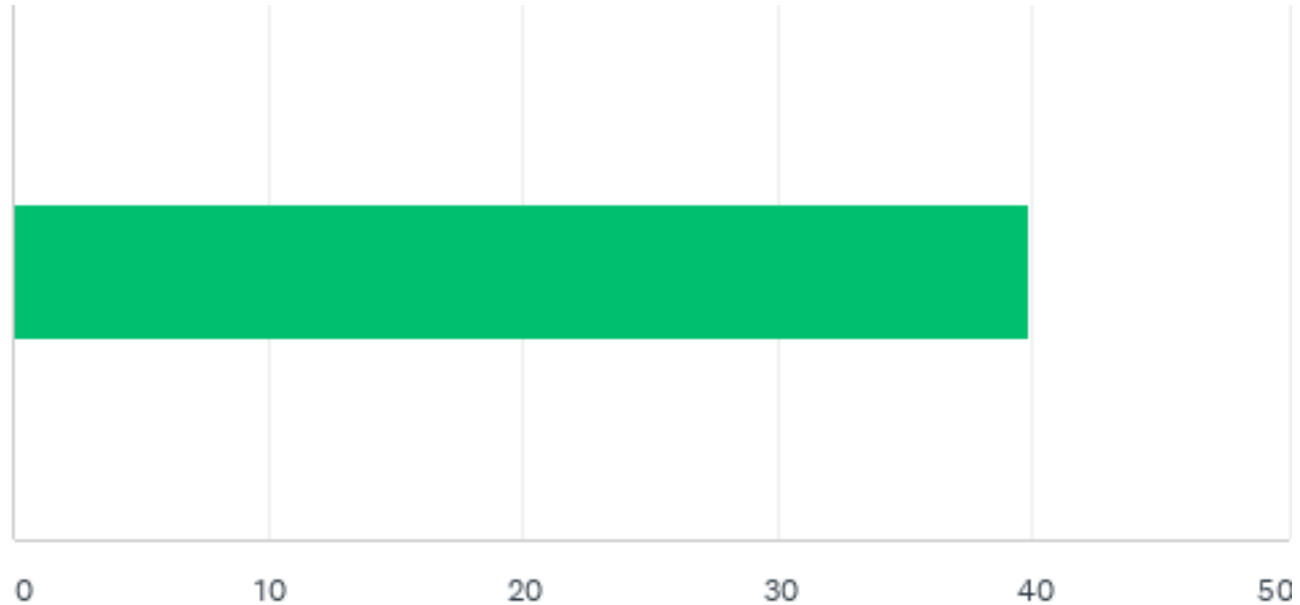

# Q6: Pediatric liver surgery should rather be performed by transplant surgeons then by pediatric surgeons

Answered: 9   Skipped: 0

| ANSWER CHOICES       | AVERAGE NUMBER | TOTAL NUMBER | RESPONSES |
|----------------------|----------------|--------------|-----------|
|                      | 40             | 359          | 9         |
| Total Respondents: 9 |                |              |           |

## Q7: It is necessary that the surgical team for pediatric liver tumors include a pediatric surgeon and a transplant surgeon

Answered: 9 Skipped: 0

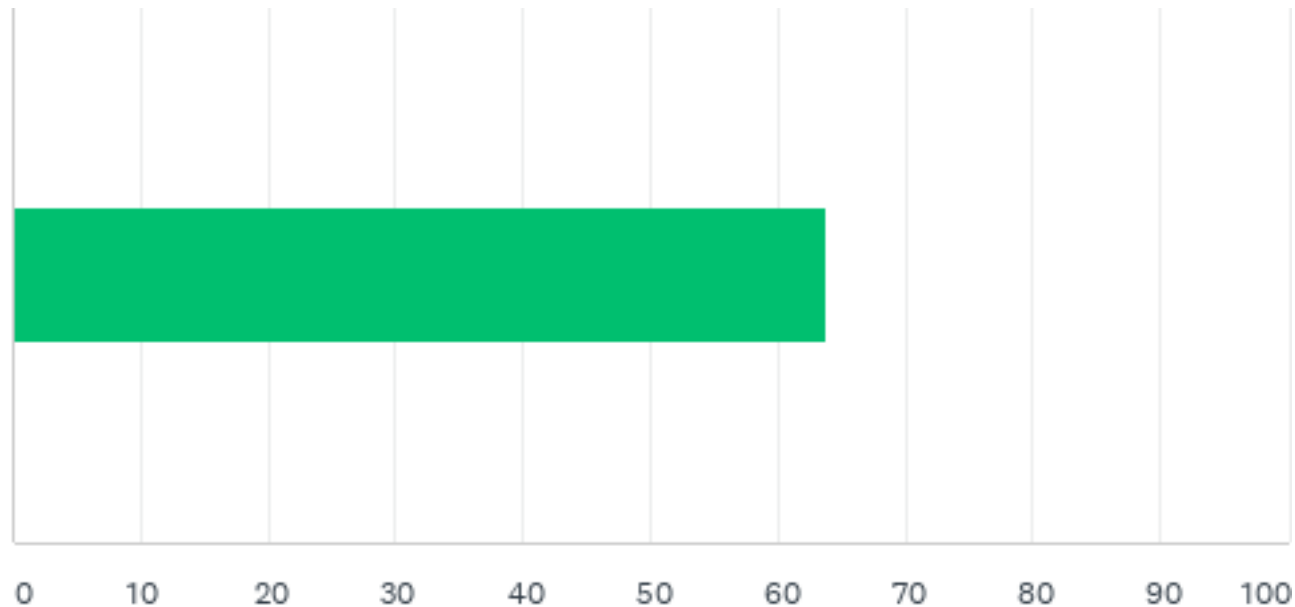

# Q7: It is necessary that the surgical team for pediatric liver tumors include a pediatric surgeon and a transplant surgeon

Answered: 9   Skipped: 0

| ANSWER CHOICES       | AVERAGE NUMBER | TOTAL NUMBER | RESPONSES |
|----------------------|----------------|--------------|-----------|
|                      | 64             | 574          | 9         |
| Total Respondents: 9 |                |              |           |

# Q8: Pediatric liver surgery should be performed via laparotomy

Answered: 9   Skipped: 0

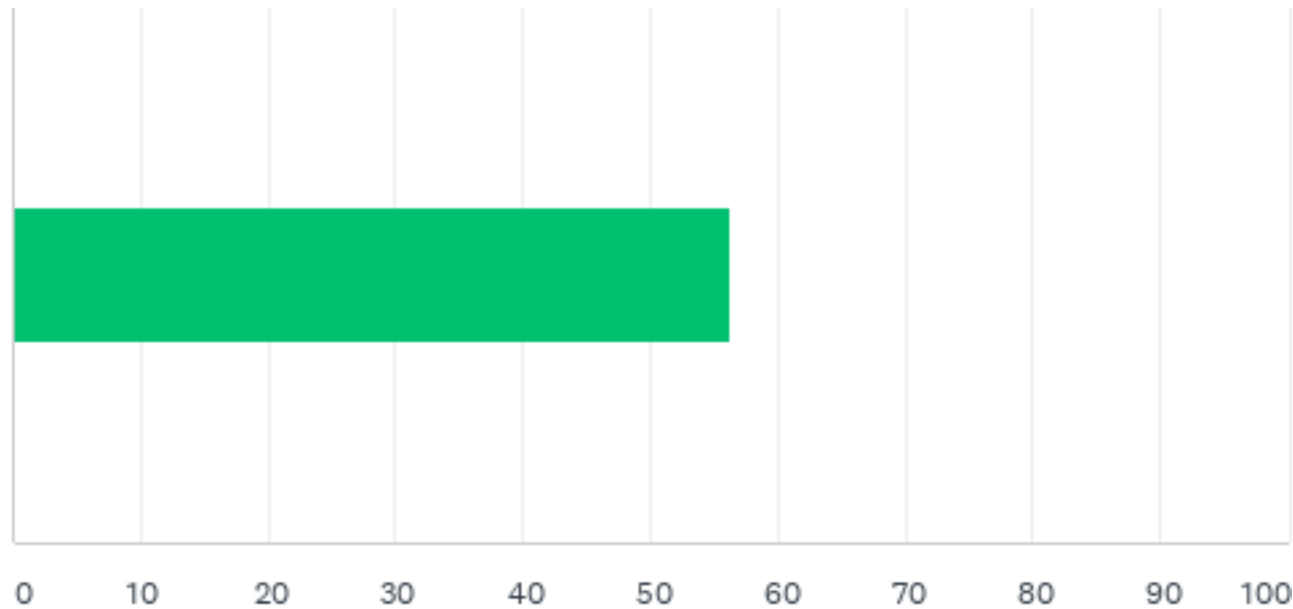



# Q8: Pediatric liver surgery should be performed via laparotomy

Answered: 9   Skipped: 0

| ANSWER CHOICES       | AVERAGE NUMBER | TOTAL NUMBER | RESPONSES |
|----------------------|----------------|--------------|-----------|
|                      | 56             | 507          | 9         |
| Total Respondents: 9 |                |              |           |

## Q9: Laparoscopy should be an option for minor and major cases of pediatric liver surgery

Answered: 9 Skipped: 0

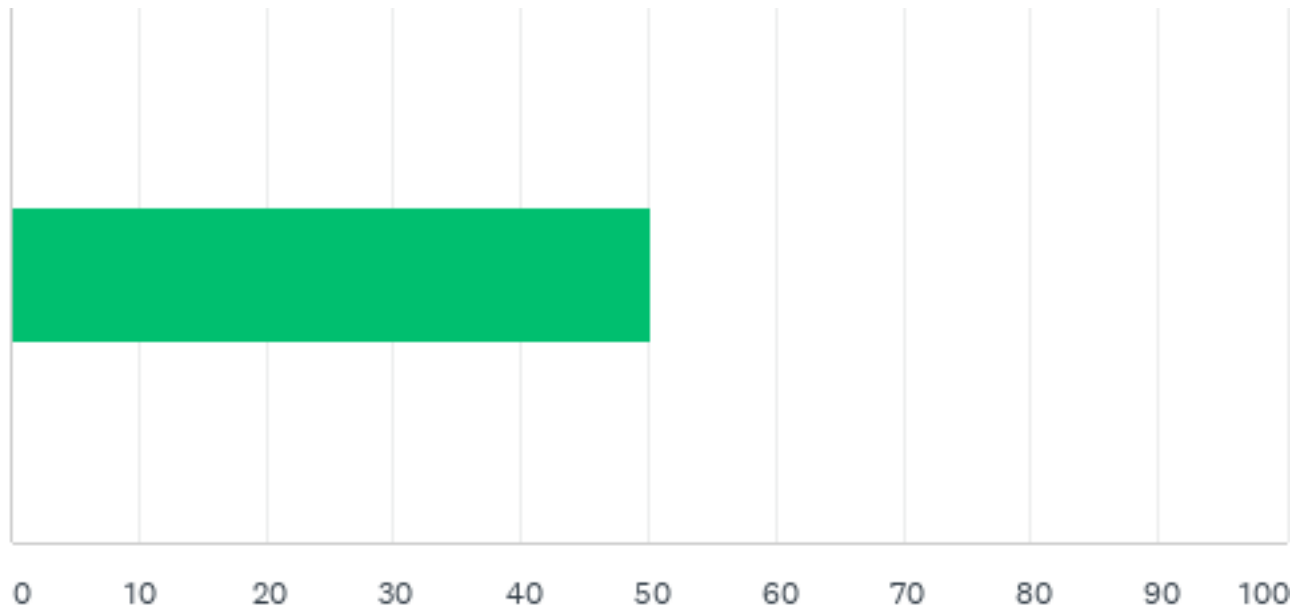

# Q9: Laparoscopy should be an option for minor and major cases of pediatric liver surgery

Answered: 9   Skipped: 0

| ANSWER CHOICES       | AVERAGE NUMBER | TOTAL NUMBER | RESPONSES |
|----------------------|----------------|--------------|-----------|
|                      | 50             | 451          | 9         |
| Total Respondents: 9 |                |              |           |

## Q10: The knowledge of techniques for different types of vascular exclusion is mandatory for pediatric liver surgery

Answered: 9 Skipped: 0

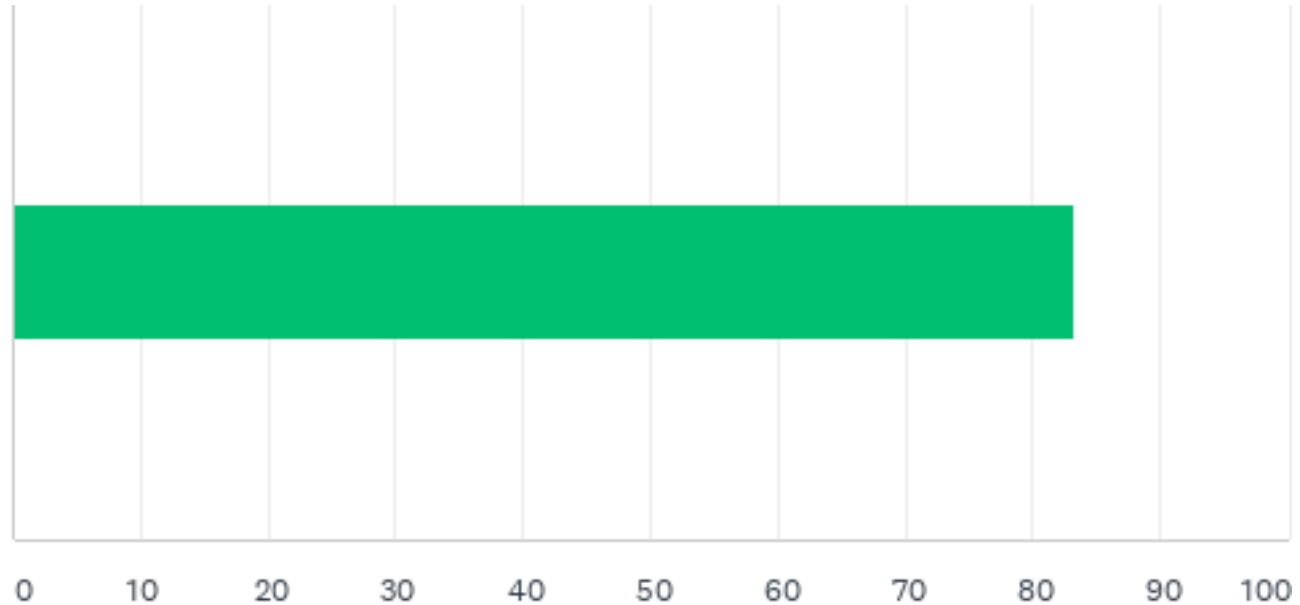

# Q10: The knowledge of techniques for different types of vascular exclusion is mandatory for pediatric liver surgery

Answered: 9   Skipped: 0

| ANSWER CHOICES       | AVERAGE NUMBER | TOTAL NUMBER | RESPONSES |
|----------------------|----------------|--------------|-----------|
|                      | 83             | 749          | 9         |
| Total Respondents: 9 |                |              |           |

## Q11: Pringle is necessary during liver parenchymal dissection

Answered: 8 Skipped: 1

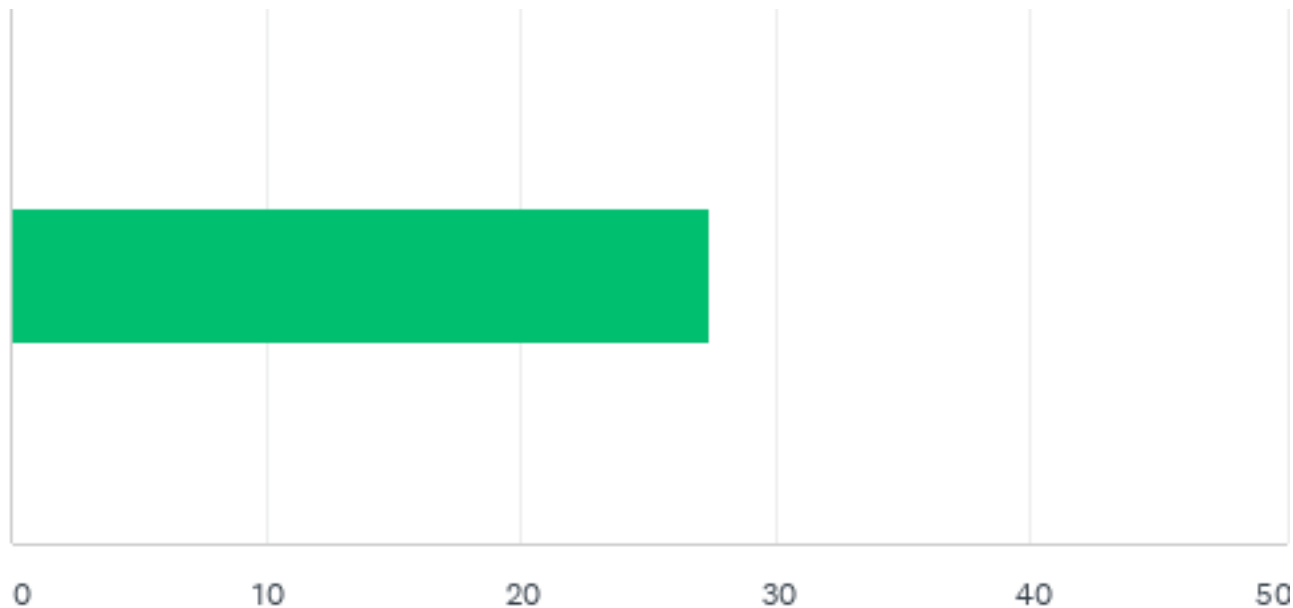

# Q11: Pringle is necessary during liver parenchymal dissection

Answered: 8   Skipped: 1

| ANSWER CHOICES       | AVERAGE NUMBER | TOTAL NUMBER | RESPONSES |
|----------------------|----------------|--------------|-----------|
|                      | 27             | 219          | 8         |
| Total Respondents: 8 |                |              |           |

## Q12: Total vascular exclusion should be prepared during major liver resection

Answered: 8 Skipped: 1

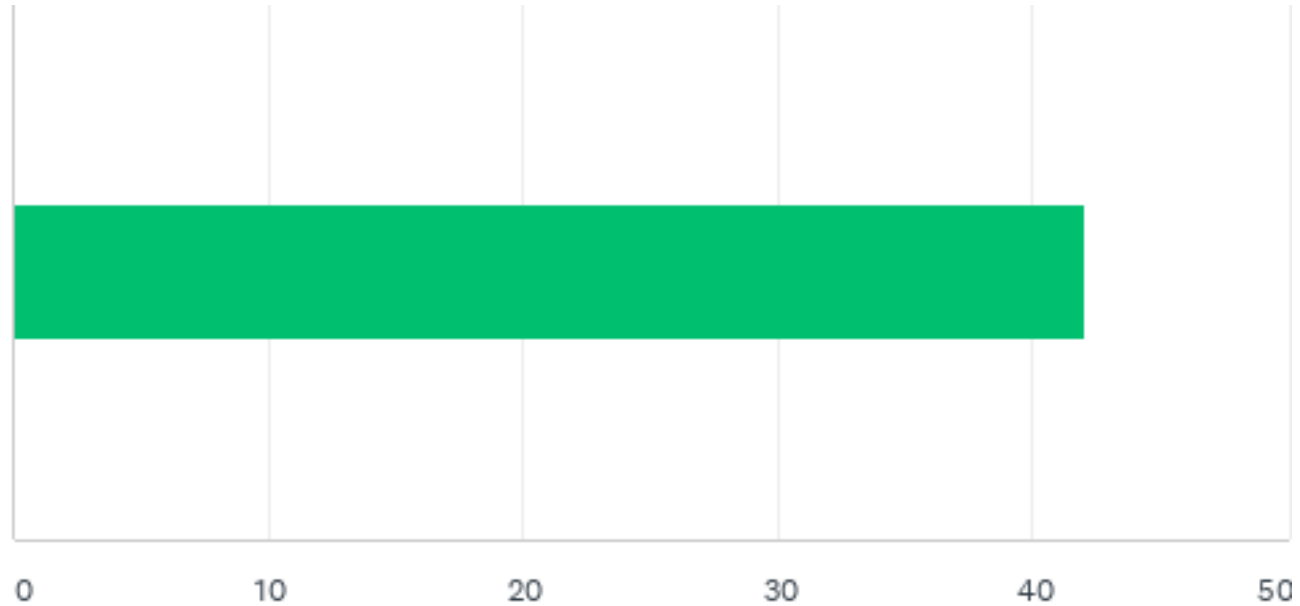



# Q12: Total vascular exclusion should be prepared during major liver resection

Answered: 8    Skipped: 1

| ANSWER CHOICES       | AVERAGE NUMBER | TOTAL NUMBER | RESPONSES |
|----------------------|----------------|--------------|-----------|
|                      | 42             | 336          | 8         |
| Total Respondents: 8 |                |              |           |

### Q13: Novel equipment (CUSA, Thunderbeat) should be available in centers of pediatric liver surgery

Answered: 8 Skipped: 1

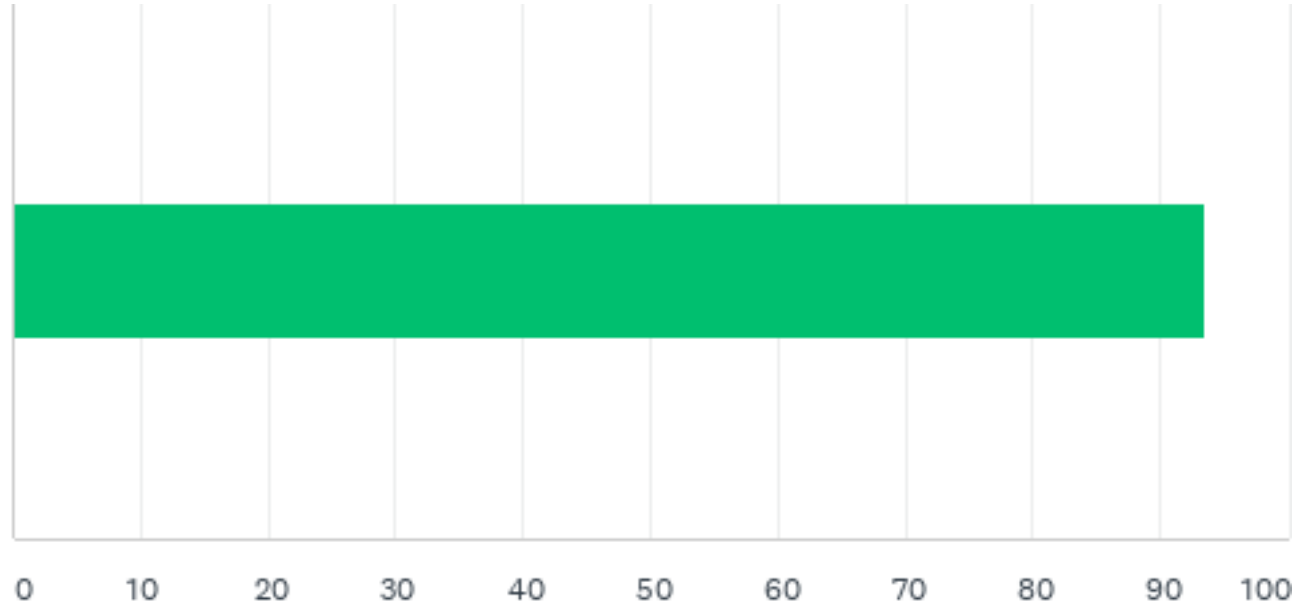

# Q13: Novel equipment (CUSA, Thunderbeat) should be available in centers of pediatric liver surgery

Answered: 8   Skipped: 1

| ANSWER CHOICES       | AVERAGE NUMBER | TOTAL NUMBER | RESPONSES |
|----------------------|----------------|--------------|-----------|
|                      | 94             | 748          | 8         |
| Total Respondents: 8 |                |              |           |

## Q14: Centers treating pediatric liver tumors should include a pediatric transplant program

Answered: 8 Skipped: 1

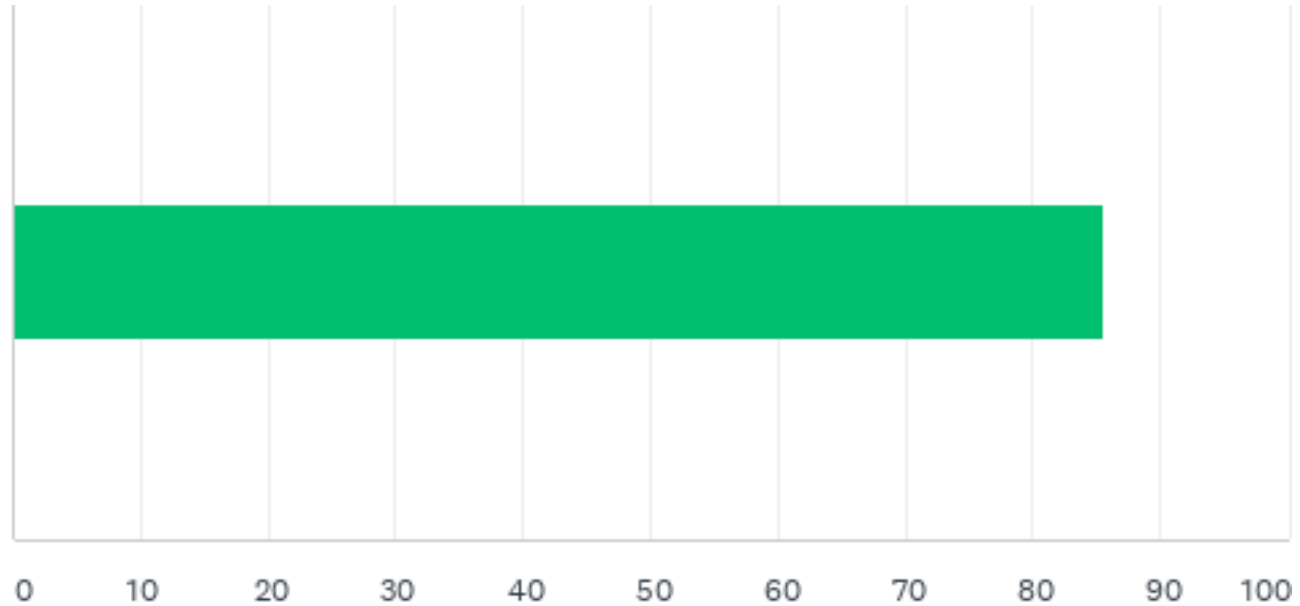

# Q14: Centers treating pediatric liver tumors should include a pediatric transplant program

Answered: 8   Skipped: 1

| ANSWER CHOICES       | AVERAGE NUMBER | TOTAL NUMBER | RESPONSES |
|----------------------|----------------|--------------|-----------|
|                      | 86             | 685          | 8         |
| Total Respondents: 8 |                |              |           |

# Q15: Living donor transplantation should be an option in centers treating pediatric liver tumors

Answered: 9   Skipped: 0

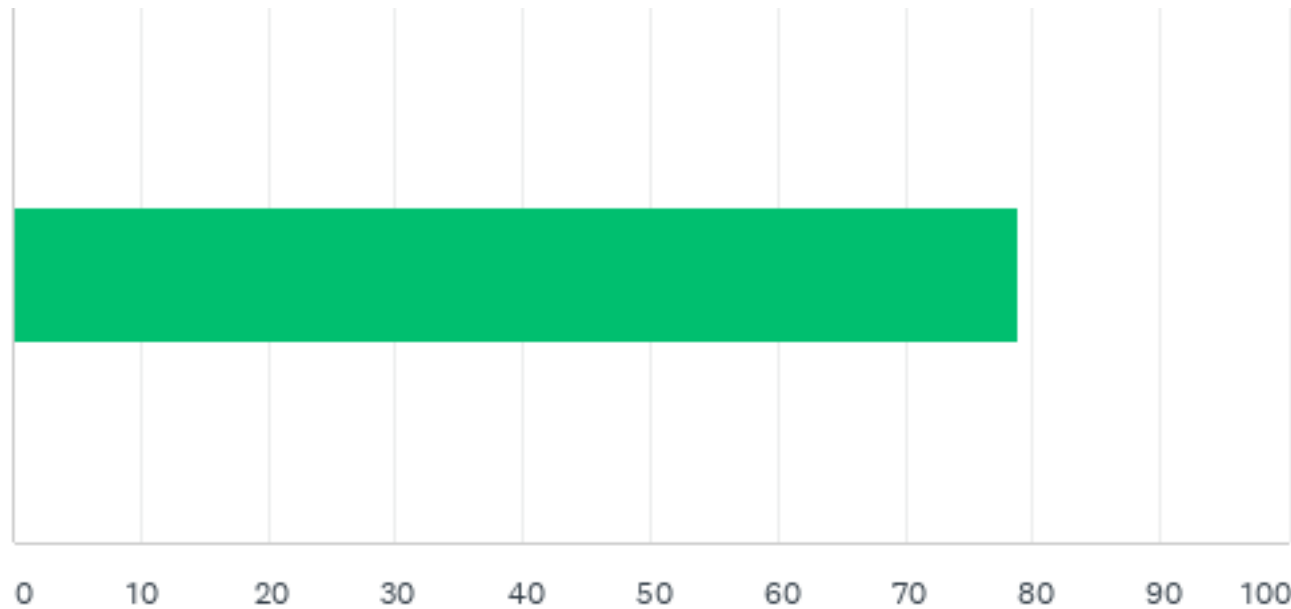

# Q15: Living donor transplantation should be an option in centers treating pediatric liver tumors

Answered: 9   Skipped: 0

| ANSWER CHOICES       | AVERAGE NUMBER | TOTAL NUMBER | RESPONSES |
|----------------------|----------------|--------------|-----------|
|                      | 79             | 710          | 9         |
| Total Respondents: 9 |                |              |           |

## Q16: Pediatric liver transplantation should be performed by transplant surgeons rather than by specialized pediatric surgeons

Answered: 9 Skipped: 0

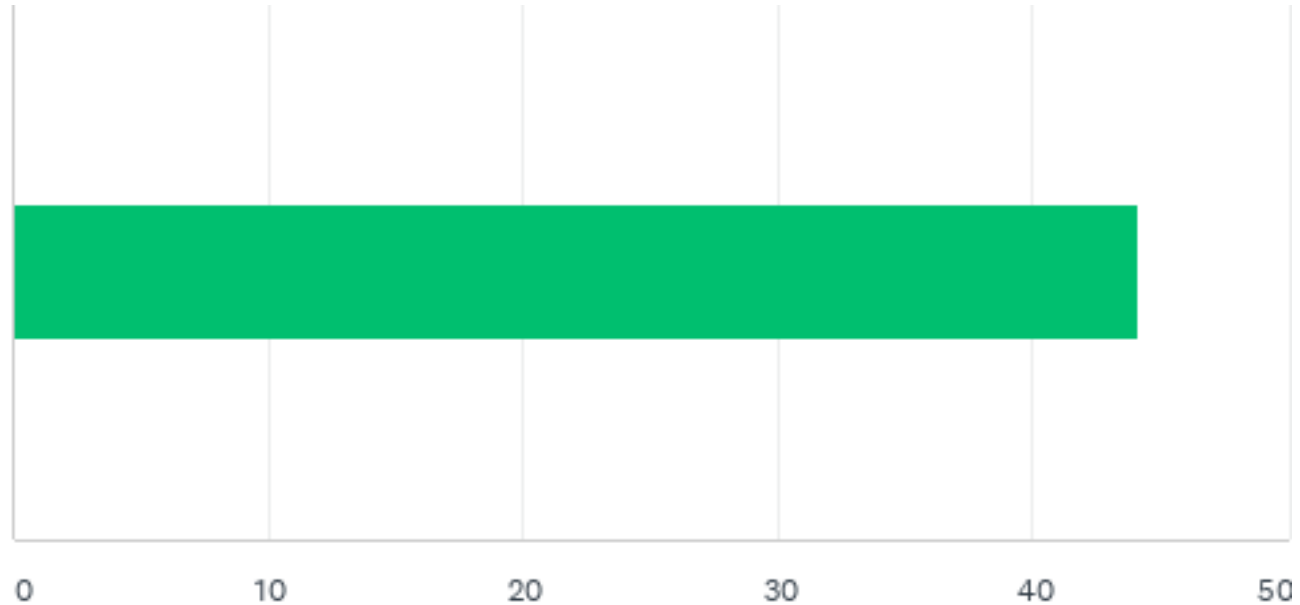



# Q16: Pediatric liver transplantation should be performed by transplant surgeons rather than by specialized pediatric surgeons

Answered: 9    Skipped: 0

| ANSWER CHOICES       | AVERAGE NUMBER | TOTAL NUMBER | RESPONSES |
|----------------------|----------------|--------------|-----------|
|                      | 44             | 397          | 9         |
| Total Respondents: 9 |                |              |           |
